# Supplementary material for: Accurate tuning of rare earth metal–organic frameworks with unprecedented topology for white-light emission
Source: Royal Society of Chemistry journal article supplement (doi:10.1039/c9tc05471e), 2019-12-06
Supplement: c9tc05471e1.pdf [file c9tc05471e1.pdf]

## Supporting Information

### **Accurate tuning of Rare Earth Metal-Organic Frameworks with unprecedented topology for white-light emission**

Yutong Wang<sup>†,‡</sup>, Kai Zhang<sup>†,‡</sup>, Xiaokang Wang<sup>†</sup>, Xuelian Xin<sup>#</sup>, Xiurong Zhang<sup>†</sup>, Weidong Fan<sup>†</sup>, Ben Xu<sup>†</sup>, Fangna Dai<sup>†§\*</sup> and Daofeng Sun<sup>†§\*</sup>

<sup>†</sup> College of Science, China University of Petroleum (East China), Qingdao, Shandong 266580, China

<sup>§</sup>School of Materials Science and Engineering, China University of Petroleum (East China), Qingdao, Shandong 266580, China

<sup>#</sup> College of Public Health & Key Laboratory of Medicinal Chemistry and Molecular Diagnosis, Ministry of Education, Hebei University, No. 342 Yuhua Donglu, Baoding 071000, China

<sup>‡</sup> These authors contributed equally to this work.

Corresponding Authors:

\* [wndai@upc.edu.cn](mailto:wndai@upc.edu.cn); [dfsun@upc.edu.cn](mailto:dfsun@upc.edu.cn).

## Contents

|                                                                     |           |
|---------------------------------------------------------------------|-----------|
| <b>S1. Ligand Synthesis .....</b>                                   | <b>3</b>  |
| <b>S2. Single Crystal X-ray Crystallography.....</b>                | <b>8</b>  |
| <b>S3. Powder X-ray Diffraction.....</b>                            | <b>11</b> |
| <b>S4. Photoluminescence .....</b>                                  | <b>16</b> |
| <b>S5. CIE coordinate calculation.....</b>                          | <b>18</b> |
| <b>S6. ICP Analysis .....</b>                                       | <b>23</b> |
| <b>S7. IR Spectrum.....</b>                                         | <b>23</b> |
| <b>S8. Thermogravimetric Analysis.....</b>                          | <b>26</b> |
| <b>S9. UV-vis adsorption and Solid-state emission spectra .....</b> | <b>28</b> |
| <b>S10. Topology Analysis .....</b>                                 | <b>29</b> |

## S1.Ligand Synthesis

### Synthesis of H<sub>3</sub>L-X (X= -H, -F, -Cl, -NH<sub>2</sub>, -CH<sub>3</sub>, -OCH<sub>3</sub>)

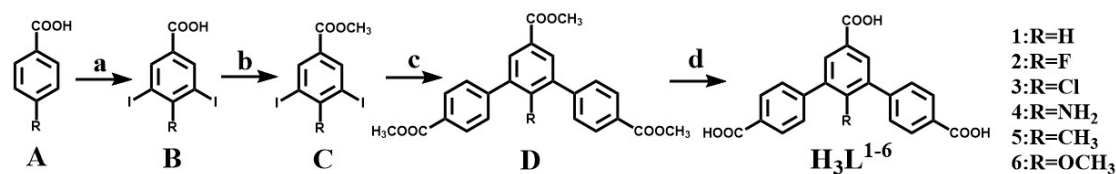

### Synthesis of H<sub>3</sub>L-H and H<sub>3</sub>L-NH<sub>2</sub>

H<sub>3</sub>L-H and H<sub>3</sub>L-NH<sub>2</sub> were prepared according to the reported procedures.<sup>1</sup>

### Synthesis of H<sub>3</sub>L-F

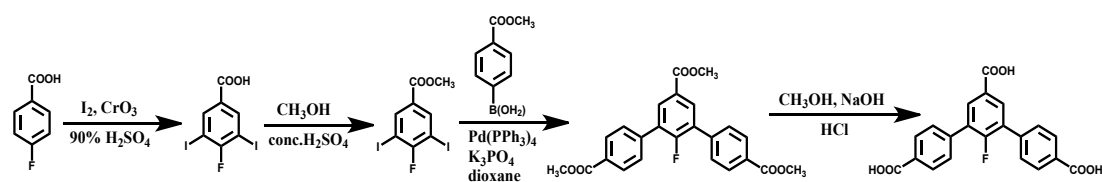

**Scheme S1.** Synthetic procedure for H<sub>3</sub>L-F.

#### (1) 4-fluoro-3,5-diiodobenzoic acid

CrO<sub>3</sub> (2.0g, 20.0 mmol) and finely powdered iodine (5.08 g, 20.0mmol) were added into H<sub>2</sub>SO<sub>4</sub> (90%, 100ml, V/V) solution. The mixture was stirred at 30 °C for 30 min, following by the addition of 4-fluorobenzoic acid (2.10 g, 15.0 mmol). The mixture was stirred at 25-30 °C for 24 h and then poured into ice/water and collected via vacuum filtration. The solid was washed with cool water and then dried *in vacuo* at 50 °C. The crude (3.41 g, 58%) material was collected as a white solid, which was used without further purification. <sup>1</sup>H NMR (400 MHz, CDCl<sub>3</sub>) δ 8.42 (s, 2 H), 12.74(s, H) ppm.

#### (2) Methyl 4-amino-3,5-diiodobenzoate

4-fluoro-3,5-diiodobenzoic acid (19.6 g, 50.0 mmol) was suspended in 200 ml methanol at room temperature. Concentrated H<sub>2</sub>SO<sub>4</sub> (9.5ml) was added slowly with rapid stirring and then the reaction mixture was heated under reflux for 48 h. TLC (silica, CH<sub>2</sub>Cl<sub>2</sub>) was utilized to indicate the complete consumption of the starting materials. The solution was cooled down to room temperature, and then product [18.87 g (93%)] was precipitated in an ice bath. <sup>1</sup>H NMR (400 MHz, CDCl<sub>3</sub>) δ 3.88 (s, 3 H), 8.32 (s, 2 H) ppm. Anal. Calc. for C<sub>8</sub>H<sub>5</sub>I<sub>2</sub>FO<sub>2</sub> (mw 406): C, 23.65; H 1.23. Found: C, 23.63; H, 1.21.

### (3) Trimethyl 2'-fluoro-[1,1':3',1''-terphenyl]-4,4'',5'-tricarboxylate

Methyl 4-amino-3,5-diiodobenzoate (1.62 g, 4 mmol), methyl 4-boronobenzoate (1.57 g, 9.6 mmol), Pd(PPh<sub>3</sub>)<sub>4</sub> (0.15 g, 0.13 mmol) and K<sub>3</sub>PO<sub>4</sub> (3.82 g, 18.0 mmol) were placed in a 500 ml two-necked round bottom flask under N<sub>2</sub> atmosphere. The flask was further charged with 200 mL of dry 1,4-dioxane, and heated for 48 h. After the mixture was cooled down to room temperature, the solvent was removed and water was added. The water phase was washed with CH<sub>2</sub>Cl<sub>2</sub> while the mixed organic phase was further dried by MgSO<sub>4</sub>. After the solvent was removed, the crude product was purified by column chromatography with CH<sub>2</sub>Cl<sub>2</sub> as the eluent. <sup>1</sup>H NMR (400 MHz, CDCl<sub>3</sub>) δ 3.87(s, 3H), 3.96(s, 6H), 7.81(d, 4H), 8.16(s, 2H), 8.29(d, 4H) ppm. Anal. Calc. for C<sub>24</sub>H<sub>19</sub>FO<sub>6</sub> (mw 422): C, 68.25; H, 4.50. Found: C, 68.27; H, 4.55.

### (4) 2'-fluoro-[1,1':3',1''-terphenyl]-4,4'',5'-tricarboxylic acid

Trimethyl 2'-fluoro-[1,1':3',1''-terphenyl]-4,4'',5'-tricarboxylate (2.0 g, 4.7 mmol) was dissolved in 50 mL MeOH, following by the addition of 50 mL 2 M NaOH aqueous solution. The mixture was stirred at 50 °C overnight. The organic phase was removed, and the aqueous phase was acidified with dilute hydrochloric acid. The yellow precipitate was filtered and washed with water for several times. <sup>1</sup>H NMR (400 MHz, DMSO-d<sub>6</sub>) δ 7.66(d, 4H), 7.94(s, 2H), 8.06(d, 4H), 12.78(s, 3H) ppm. Anal. Calc. for C<sub>21</sub>H<sub>15</sub>NO<sub>6</sub> (mw 377): C, 66.84; N, 3.71; H, 4.01. Found: C, 66.78; N, 3.73; H, 4.00.

### Synthesis of H<sub>3</sub>L-Cl

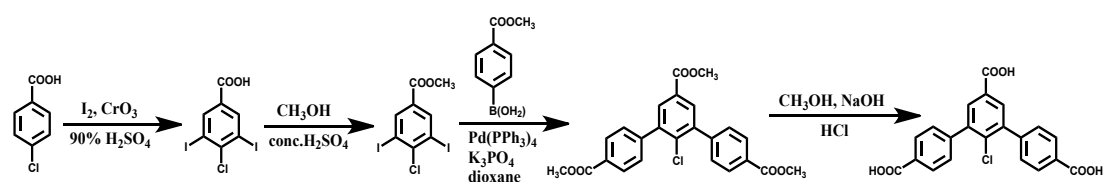

Scheme S2. Synthetic procedures of the H<sub>3</sub>L-Cl.

#### (1) 4-chloro-3,5-diiodobenzoic acid

CrO<sub>3</sub> (2.0g, 20.0 mmol) and finely powdered iodine (5.08 g, 20.0mmol) were added into H<sub>2</sub>SO<sub>4</sub> (90%, 100ml, V/V) solution. The mixture was stirred at 30 °C for 30 min, following by the addition of 4-chlorobenzoic acid (2.34 g, 15.0 mmol). The mixture was stirred at 25-30 °C for 24 h and then poured into ice/water and collected via vacuum filtration. The solid was washed with cool water and then dried *in vacuo* at 50 °C. The

crude (4.28 g, 70%) material was collected as a white solid which was used without further purification.  $^1\text{H}$  NMR (400 MHz,  $\text{CDCl}_3$ )  $\delta$  8.44 (s, 2 H), 12.74(s, H) ppm.

### **(2) Methyl 4-chloro-3,5-diiodobenzoate**

4-chloro-3,5-diiodobenzoic acid (20.4 g, 50.0 mmol) was suspended in 200 mL methanol at room temperature. Concentrated  $\text{H}_2\text{SO}_4$  (9.5 mL) was added slowly with rapid stirring, followed by heating under reflux for 48 h. TLC (silica,  $\text{CH}_2\text{Cl}_2$ ) was utilized to indicate the complete consumption of the starting materials. The solution was initially cooled down to room temperature, and the white product [20.7 g (98%)] was precipitated in an ice bath.  $^1\text{H}$  NMR (400 MHz,  $\text{CDCl}_3$ )  $\delta$  3.88 (s, 3 H), 8.28 (s, 2 H) ppm. Anal. Calc. for  $\text{C}_8\text{H}_5\text{I}_2\text{ClO}_2$  (mw 422): C, 22.75; H, 1.18. Found: C, 22.76; H, 1.11.

### **(3) Trimethyl 2'-chloro-[1,1':3',1''-terphenyl]-4,4'',5'-tricarboxylate**

Methyl 4-chloro-3,5-diiodobenzoate (1.69 g, 4 mmol), methyl 4-boronobenzoate (1.57 g, 9.6 mmol),  $\text{Pd}(\text{PPh}_3)_4$  (0.15 g, 0.13 mmol) and  $\text{K}_3\text{PO}_4$  (3.82 g, 18.0 mmol) were placed in a 500 ml two-necked round bottom flask under  $\text{N}_2$  gas atmosphere. The flask was further charged with 200 mL dry 1,4-dioxane, and heated for 48 h. After the mixture was cooled down to room temperature, the solvent was removed and water was added. The water phase was washed with  $\text{CH}_2\text{Cl}_2$ . The mixed organic phase was dried by  $\text{MgSO}_4$ . After the solvent was removed, the crude product was purified by column chromatography with  $\text{CH}_2\text{Cl}_2$  as the eluent.  $^1\text{H}$  NMR (400 MHz,  $\text{CDCl}_3$ )  $\delta$  3.87(s, 3H), 3.96(s, 6H), 7.80(d, 4H), 8.12(s, 2H), 8.21(d, 4H) ppm. Anal. Calc. for  $\text{C}_{24}\text{H}_{19}\text{ClO}_6$  (mw 438): C, 65.75; H, 4.34. Found: C, 65.80; H, 4.30.

### **(4) 2'-chloro-[1,1':3',1''-terphenyl]-4,4'',5'-tricarboxylic acid**

Trimethyl 2'-chloro-[1,1':3',1''-terphenyl]-4,4'',5'-tricarboxylate (2.0 g, 4.6 mmol) was dissolved in 50 mL MeOH, followed by the addition of 50 mL 2 M NaOH aqueous solution. The mixture was stirred at 50 °C overnight. The organic phase was removed, and the aqueous phase was acidified with dilute hydrochloric acid. The yellow precipitate was filtered and washed with water several times.  $^1\text{H}$  NMR (400 MHz,  $\text{DMSO-d}_6$ )  $\delta$  7.64(d, 4H), 7.93(s, 2H), 8.05(d, 4H), 13.21(s, 3H) ppm. Anal. Calc. for  $\text{C}_{21}\text{H}_{13}\text{ClO}_6$  (mw 396): C, 63.64; H, 3.28. Found: C, 63.68; H, 3.23.

### **Synthesis of $\text{H}_3\text{L-CH}_3$**

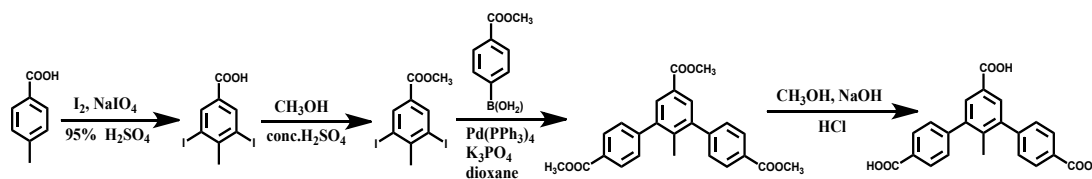

**Scheme S3.** Synthetic procedures of the **H<sub>3</sub>L-CH<sub>3</sub>**.

### (1) 3,5-diiodo-4-methylbenzoic acid

NaIO<sub>4</sub> (0.34 g, 1.59 mmol) and finely powdered iodine (1.20 g, 4.73 mmol) were added in H<sub>2</sub>SO<sub>4</sub> (95%, 30 mL, V/V) solution. The mixture was stirred at 30 °C for 30 min, followed by the addition of 4-methylbenzoic acid (2.04 g, 15.0 mmol). The mixture was stirred at 30 °C for 2 h and then poured into ice/water and filtered by a vacuum. The solid was washed with cool water and then dried by vacuum at 50 °C. The material was further recrystallized with ethanol, affording a white solid (3.43 g, 59%). <sup>1</sup>H NMR (400 MHz, CDCl<sub>3</sub>) δ 3.36 (s, 3 H), 8.44 (s, 2 H), 12.74 (s, H) ppm.

### (2) Methyl 3,5-diiodo-4-methylbenzoate

3,5-diiodo-4-methylbenzoic acid (19.39 g, 50.0 mmol) was suspended in 200 mL methanol at room temperature. Concentrated H<sub>2</sub>SO<sub>4</sub> (9.5 mL) was added slowly with rapid stirring followed by heating under reflux for 48 h. TLC (silica, CH<sub>2</sub>Cl<sub>2</sub>) was utilized to indicate the complete consumption of the starting materials. The solution was cooled down to room temperature and then the product [19.08 g (95%)] was precipitated in an ice bath. <sup>1</sup>H NMR (400 MHz, CDCl<sub>3</sub>) δ 3.36 (s, 3 H), 3.88 (s, 3 H), 8.22 (s, 2 H) ppm. Anal. Calc. for C<sub>9</sub>H<sub>8</sub>I<sub>2</sub>O<sub>2</sub> (mw 402): C, 26.86; H, 1.99. Found: C, 26.79; H, 1.98.

### (3) Trimethyl 2'-methyl-[1,1':3',1''-terphenyl]-4,4'',5'-tricarboxylate

Methyl 4-chloro-3,5-diiodobenzoate (1.61 g, 4 mmol), methyl 4-boronobenzoate (1.57 g, 9.6 mmol), Pd(PPh<sub>3</sub>)<sub>4</sub> (0.15 g, 0.13 mmol) and K<sub>3</sub>PO<sub>4</sub> (3.82 g, 18.0 mmol) were placed in a 500 mL two-necked round bottom flask under N<sub>2</sub> gas atmosphere. The flask was further charged with 200 mL dry 1,4-dioxane, and heated for 48 h. After the mixture was cooled down to room temperature, the solvent was removed and water was added. The water phase was washed with CH<sub>2</sub>Cl<sub>2</sub>. The mixed organic phase was further dried by MgSO<sub>4</sub>. After the solvent was removed, the crude product was purified by column chromatography with CH<sub>2</sub>Cl<sub>2</sub> as the eluent. <sup>1</sup>H NMR (400 MHz, CDCl<sub>3</sub>) δ 3.87 (s, 3H), 3.96 (s, 6H), 7.75 (d, 4H), 7.94 (s, 2H), 8.46 (d, 4H) ppm. Anal. Calc. for

C<sub>25</sub>H<sub>22</sub>O<sub>6</sub> (mw 418): C, 71.76; H, 5.30. Found: C, 71.78; H, 5.25.

#### (4) 2'-methyl-[1,1':3',1''-terphenyl]-4,4'',5'-tricarboxylic acid

Trimethyl 2'-methyl-[1,1':3',1''-terphenyl]-4,4'',5'-tricarboxylate (2.0 g, 4.8 mmol) was dissolved in 50 mL of MeOH, followed by the addition of 50 mL 2 M NaOH aqueous solution. The mixture was stirred at 50 °C overnight. The organic phase was removed, while the aqueous phase was acidified with diluted hydrochloric acid. The yellow precipitate was filtered and washed with water for several times. <sup>1</sup>H NMR (400 MHz, DMSO-d<sub>6</sub>) δ 3.36 (s, 3H), 7.57(d, 4H), 7.80 (s, 2H), 8.04(d, 4H), 13.08(s, 3H) ppm. Anal. Calc. for C<sub>22</sub>H<sub>16</sub>O<sub>6</sub> (mw 376): C, 70.21; H, 4.29. Found: C, 70.18; H, 4.30.

#### Synthesis of H<sub>3</sub>L-OCH<sub>3</sub>

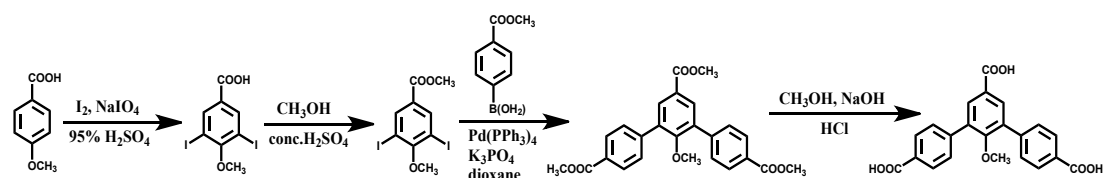

**Scheme S4.** Synthetic procedure for H<sub>3</sub>L-OCH<sub>3</sub>.

#### (1) 3,5-diiodo-4-methoxybenzoic acid

NaIO<sub>4</sub> (0.34 g, 1.59mmol) and finely powdered iodine (1.20 g, 4.73 mmol) were added in H<sub>2</sub>SO<sub>4</sub> (95%, 30mL, V/V) solution. The mixture was stirred at 30 °C for 30 min followed by the addition of 4-methoxybenzoic acid (2.28 g, 15.0 mmol). The mixture was stirred at 30 °C for 2 h and then poured into ice/water and filtered by a vacuum. The solid was washed with cool water and then dried by vacuum at 50 °C. Upon recrystallization with ethanol, a white solid was collected (3.82 g, 63%) and used without further purification. <sup>1</sup>H NMR (400 MHz, CDCl<sub>3</sub>) δ 3.83(s, 3 H) 8.50 (s, 2 H), 12.74(s, H) ppm.

#### (2) Methyl 3,5-diiodo-4-methoxybenzoate

3,5-diiodo-4-methoxybenzoic acid (20.19 g, 50.0 mmol) was suspended in 200 mL methanol at room temperature. Concentrated H<sub>2</sub>SO<sub>4</sub> (9.5ml) was added slowly with rapid stirring, followed by heating under reflux for 48 h. TLC (silica, CH<sub>2</sub>Cl<sub>2</sub>) was utilized to indicate the complete consumption of the starting materials. The solution was cooled down to room temperature, and then the white product [20.0 g (96%)] was precipitated in an ice bath. <sup>1</sup>H NMR (400 MHz, CDCl<sub>3</sub>) δ 3.83 (s, 3 H), 3.89 (s, 3 H),

8.23 (s, 2 H) ppm. Anal. Calc. for C<sub>9</sub>H<sub>8</sub>I<sub>2</sub>O<sub>3</sub> (mw 418): C, 25.86; H, 1.93. Found: C, 25.80; H, 1.91.

### (3) Trimethyl 2'-methoxy-[1,1':3',1''-terphenyl]-4,4'',5'-tricarboxylate

Methyl 3,5-diiodo-4-methoxybenzoate (1.67 g, 4 mmol), methyl 4-boronobenzoate (1.57 g, 9.6 mmol), Pd(PPh<sub>3</sub>)<sub>4</sub> (0.15 g, 0.13 mmol) and K<sub>3</sub>PO<sub>4</sub> (3.82 g, 18.0 mmol) were placed in a 500 mL two-necked round bottom flask under N<sub>2</sub> gas atmosphere. The flask was further charged with 200 mL dry 1,4-dioxane, and heated for 48 h. After the mixture was cooled down to room temperature, the solvent was removed and water was added. The water phase was washed with CH<sub>2</sub>Cl<sub>2</sub>. The mixed organic phase was dried with MgSO<sub>4</sub>. After the solvent was removed, the crude product was purified by column chromatography with CH<sub>2</sub>Cl<sub>2</sub> as the eluent. <sup>1</sup>H NMR (400 MHz, CDCl<sub>3</sub>) δ 3.83(s, 3H), 3.87(s, 3H), 3.96(s, 6H), 7.59(d, 4H), 7.84(s, 2H), 8.16(d, 4H) ppm. Anal. Calc. for C<sub>23</sub>H<sub>22</sub>O<sub>7</sub> (mw 434): C, 69.12; H, 5.10. Found: C, 69.20; H, 5.0.

### (4) 2'-methoxy-[1,1':3',1''-terphenyl]-4,4'',5'-tricarboxylic acid

Trimethyl 2'-methoxy-[1,1':3',1''-terphenyl]-4,4'',5'-tricarboxylate (2.0 g, 4.6 mmol) was dissolved in 50 mL MeOH followed by the addition of 50 mL of 2 M NaOH aqueous solution. The mixture was stirred at 50 °C overnight. The organic phase was removed, while the aqueous phase was acidified with dilute hydrochloric acid. The yellow precipitate was filtered and washed with water for several times. <sup>1</sup>H NMR (400 MHz, DMSO-d<sub>6</sub>) δ 2.50(s, 3H), 7.73(d, 4H), 7.96 (s, 2H), 8.05(d, 4H), 13.08(s, 3H) ppm. Anal. Calc. for C<sub>22</sub>H<sub>16</sub>O<sub>7</sub> (mw 392): C, 67.35; H, 4.11. Found: C, 67.28; H, 4.03.

## S2. Single Crystal X-ray Crystallography

All as-synthesized crystals were taken from the mother liquid without further treatment. They were transferred to an oil environment and mounted onto a loop for single crystal X-ray data collection. All crystals data were collected with a SuperNova diffractometer equipped with mirror Cu-K $\alpha$  radiation ( $\lambda = 1.54184 \text{ \AA}$ ) and an Eos CCD detector at 150 K. The data was collected with a  $\omega$ -scan technique and an arbitrary  $\phi$ -angle. Data reductions were performed with the CrysAlisPro package, and an analytical absorption correction was performed. All the structures were solved by the direct method using the *SHELXS* program of the *SHELXTL* package and refined by the full-matrix least-squares method with *SHELXL*.<sup>2</sup> The structures were treated anisotropically, whereas the aromatic and hydroxyl hydrogen atoms were placed in calculated ideal positions and refined as riding on their respective carbon or oxygen atoms. Structure was examined using the Addsym subroutine of PLATON to assure



that no additional symmetry could be applied to the models. Crystal data collection are summarized in Table S1, Supporting Information and crystal structures can be accessed in CCDC 1951706-1951710.

**Table S1.** Crystal data and structure refinements.

| Name                                              | UPC-38(Eu)-F                                                                         | UPC-38(Eu)-Cl                                      | UPC-38(Eu)-NH <sub>2</sub>                                                          | UPC-38(Eu)-CH <sub>3</sub>                                          | UPC-38(Eu)-OCH <sub>3</sub>                                           |
|---------------------------------------------------|--------------------------------------------------------------------------------------|----------------------------------------------------|-------------------------------------------------------------------------------------|---------------------------------------------------------------------|-----------------------------------------------------------------------|
| Empirical formula                                 | C <sub>13.5</sub> H <sub>14</sub> Eu <sub>0.5</sub> F <sub>0.5</sub> NO <sub>5</sub> | C <sub>21</sub> H <sub>14</sub> ClEuO <sub>8</sub> | C <sub>13.5</sub> H <sub>15</sub> Eu <sub>0.5</sub> N <sub>1.5</sub> O <sub>5</sub> | C <sub>14</sub> H <sub>15.5</sub> Eu <sub>0.5</sub> NO <sub>5</sub> | C <sub>14.5</sub> H <sub>14</sub> Eu <sub>0.5</sub> NO <sub>5.5</sub> |
| Formula weight                                    | 355.74                                                                               | 581.73                                             | 354.25                                                                              | 353.75                                                              | 366.25                                                                |
| Temperature/K                                     | 150(10)                                                                              | 150(10)                                            | 150(10)                                                                             | 150(10)                                                             | 150(10)                                                               |
| Crystal system                                    | monoclinic                                                                           | monoclinic                                         | monoclinic                                                                          | monoclinic                                                          | monoclinic                                                            |
| Space group                                       | <i>I2/c</i>                                                                          | <i>I2/c</i>                                        | <i>I2/c</i>                                                                         | <i>I2/c</i>                                                         | <i>I2/c</i>                                                           |
| <i>a</i> /Å                                       | 9.5953(3)                                                                            | 9.6229(3)                                          | 9.6351(3)                                                                           | 9.56544(20)                                                         | 9.5566(3)                                                             |
| <i>b</i> /Å                                       | 18.5323(7)                                                                           | 19.5443(6)                                         | 18.2081(5)                                                                          | 18.1811(4)                                                          | 18.5611(6)                                                            |
| <i>c</i> /Å                                       | 15.7144(5)                                                                           | 16.2189(5)                                         | 16.2735(5)                                                                          | 16.2291(3)                                                          | 16.0663(5)                                                            |
| $\alpha$ /°                                       | 90.00                                                                                | 90.00                                              | 90.00                                                                               | 90.00                                                               | 90.00                                                                 |
| $\beta$ /°                                        | 95.776(3)                                                                            | 90.742(3)                                          | 92.405(3)                                                                           | 92.8608(17)                                                         | 93.120(3)                                                             |
| $\gamma$ /°                                       | 90.00                                                                                | 90.00                                              | 90.00                                                                               | 90.00                                                               | 90.00                                                                 |
| Volume/Å <sup>3</sup>                             | 2780.19(17)                                                                          | 3050.09(17)                                        | 2852.47(15)                                                                         | 2818.88(9)                                                          | 2845.64(16)                                                           |
| <i>Z</i>                                          | 8                                                                                    | 4                                                  | 8                                                                                   | 8                                                                   | 8                                                                     |
| $\rho_{\text{calc}}$ g/cm <sup>3</sup>            | 1.700                                                                                | 1.267                                              | 1.650                                                                               | 1.667                                                               | 1.710                                                                 |
| $\mu$ /mm <sup>-1</sup>                           | 16.737                                                                               | 15.812                                             | 16.267                                                                              | 16.450                                                              | 16.350                                                                |
| <i>F</i> (000)                                    | 1424.0                                                                               | 1136.0                                             | 1424.0                                                                              | 1424.0                                                              | 1468.0                                                                |
| Wavelength (Å)                                    | 1.54184                                                                              | 1.54184                                            | 1.54184                                                                             | 1.54184                                                             | 1.54184                                                               |
| 2 $\theta$ range for data collection/°            | 7.39 to 141.20                                                                       | 7.082 to 140.91                                    | 7.29 to 140.89                                                                      | 7.30 to 141.23                                                      | 7.28 to 141.04                                                        |
| Reflections collected                             | 10320                                                                                | 8417                                               | 5305                                                                                | 6529                                                                | 5220                                                                  |
| Independent reflections                           | 2648                                                                                 | 2857                                               | 2683                                                                                | 2659                                                                | 2569                                                                  |
| <i>R</i> <sub>int</sub>                           | 0.0600                                                                               | 0.0621                                             | 0.0320                                                                              | 0.0270                                                              | 0.0355                                                                |
| Data                                              | 2648                                                                                 | 2857                                               | 2683                                                                                | 2659                                                                | 2569                                                                  |
| Restraints                                        | 0                                                                                    | 87                                                 | 8                                                                                   | 0                                                                   | 0                                                                     |
| Parameters                                        | 186                                                                                  | 205                                                | 187                                                                                 | 192                                                                 | 173                                                                   |
| GOF on <i>F</i> <sup>2</sup>                      | 1.281                                                                                | 1.068                                              | 1.066                                                                               | 1.151                                                               | 1.068                                                                 |
| <i>R</i> 1 [ <i>I</i> > 2 $\sigma$ ( <i>I</i> )]  | 0.0544                                                                               | 0.0592                                             | 0.0579                                                                              | 0.0570                                                              | 0.0578                                                                |
| <i>wR</i> 2 [ <i>I</i> > 2 $\sigma$ ( <i>I</i> )] | 0.1367                                                                               | 0.1536                                             | 0.1601                                                                              | 0.1411                                                              | 0.1404                                                                |
| <i>R</i> 1 (all data)                             | 0.0558                                                                               | 0.0654                                             | 0.0607                                                                              | 0.0577                                                              | 0.0598                                                                |
| <i>wR</i> 2 (all data)                            | 0.1378                                                                               | 0.1572                                             | 0.1642                                                                              | 0.1415                                                              | 0.1421                                                                |
| Residue peak / hole (eÅ <sup>-3</sup> )           | 3.84/-0.84                                                                           | 2.72/-1.27                                         | 3.47/-1.01                                                                          | 2.04/-1.01                                                          | 1.74/-1.20                                                            |

### Solid state fluorescence test

The corresponding fluorescence spectra of the mixture were monitored by a Hitachi F7000 fluorescence spectrometer analyzer. Before the fluorescence test, the sample is ground, then put into the sample tank, and compacted by two transparent glass pieces. Excitation wavelength changes as needed. Instrument resolution: 1 nm. Wavelength scanning speed: 1200 nm/min. Wavelength accuracy:  $\pm 1$  nm.

### Quantum yield test

Steady-state fluorescence spectra were recorded on an Edinburgh Instruments FLS980 with three-monochromator spectrophotometer and three photomultiplier detectors. The emission spectra were corrected for the wavelength dependence of the sensitivity of the detection system. The fluorescence lifetimes were measured on FLS980 with timecorrelated single photon counting (TCSPC) method by excitation with a 441 nm picosecond laser (EPL 445). Time resolution for time resolved fluorescence spectrum is 50 ps. The absolute fluorescence quantum yields were measured with an integrating sphere.

### UPC-38(Eu<sub>0.34</sub>Tb<sub>0.66</sub>)-OCH<sub>3</sub> @LED

Grind the dried sample, and then coat the LED coated with a thin layer of vacuum ester in the sample until the LED is completely wrapped.

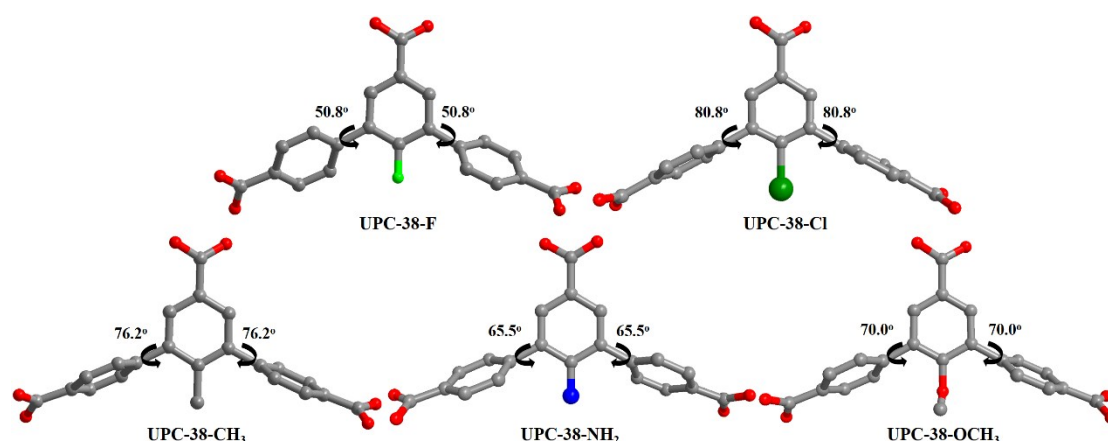

**Figure S1.** Twist angle between the central benzene ring and the side benzene ring of UPC-38-F, UPC-38-Cl, UPC-38-NH<sub>2</sub>, UPC-38-CH<sub>3</sub>, and UPC-38-OCH<sub>3</sub>, respectively.

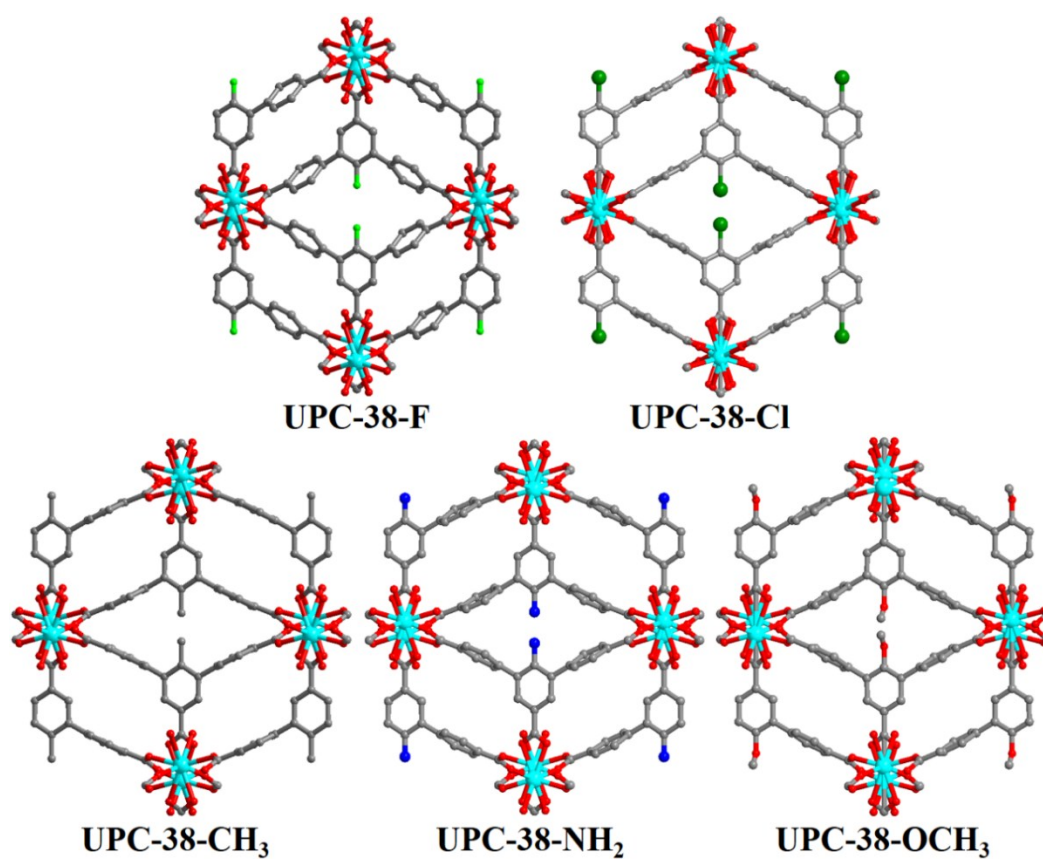

**Figure S2.** The pore sizes along the a-axis of UPC-38-H, UPC-38-F, UPC-38-Cl, UPC-38-NH<sub>2</sub>, UPC-38-CH<sub>3</sub>, and UPC-38-OCH<sub>3</sub>, respectively

### S3. Powder X-ray Diffraction

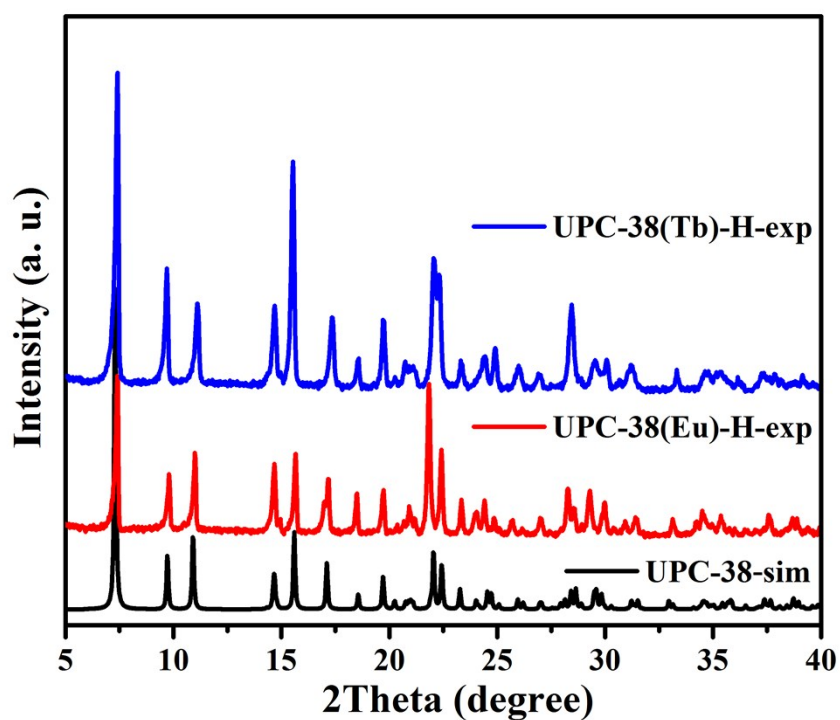

**Figure S3.** Powder X-ray diffraction (PXRD) patterns of UPC-38-H.

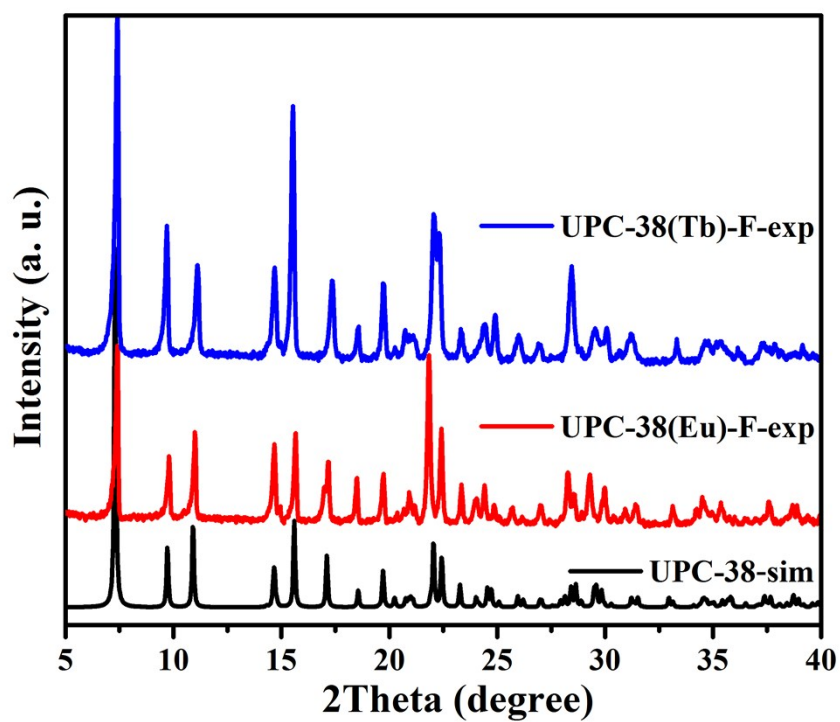

**Figure S4.** Powder X-ray diffraction (PXRD) patterns of UPC-38-F.

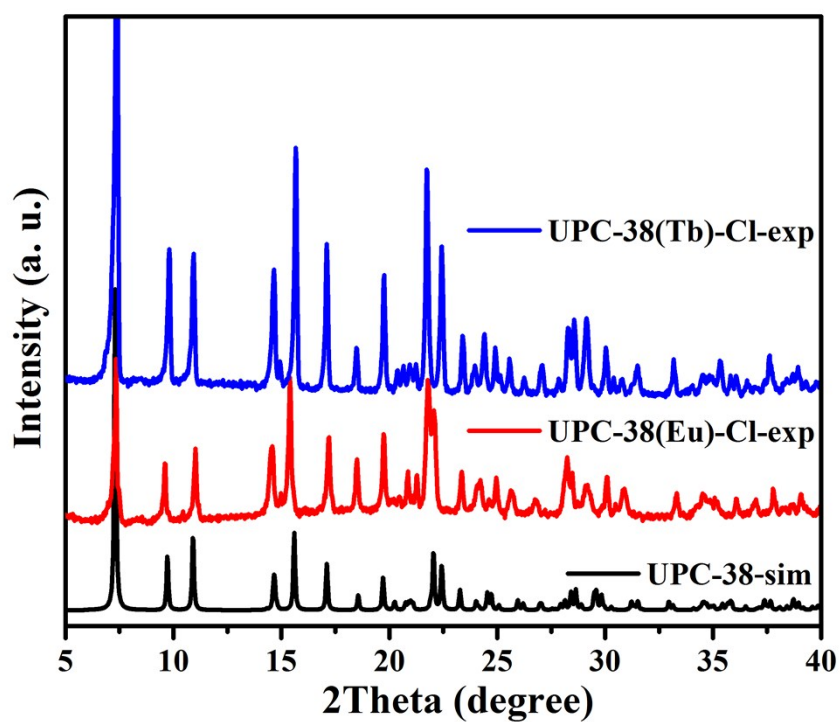

**Figure S5.** Powder X-ray diffraction (PXRD) patterns of UPC-38-Cl.

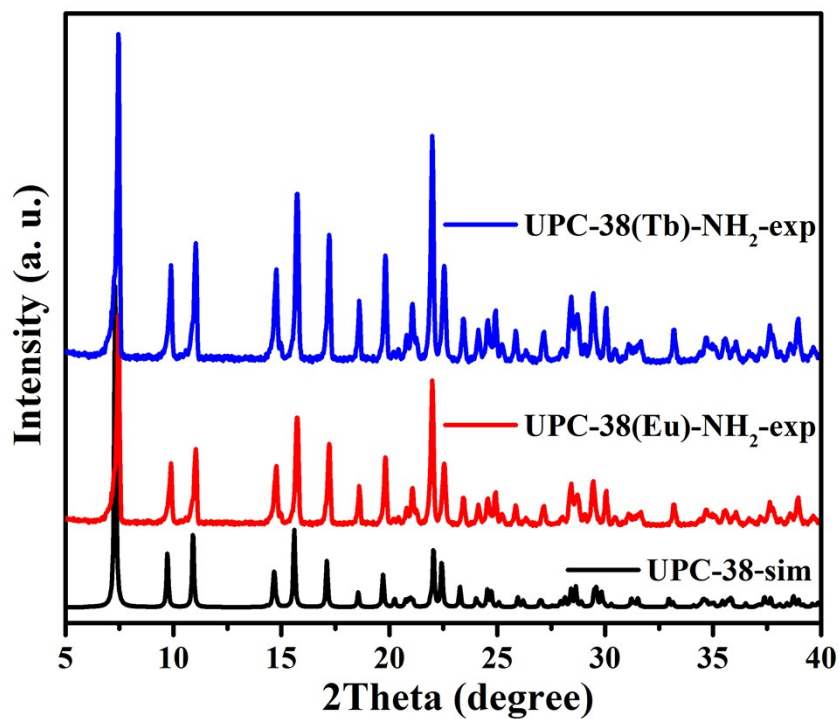

Figure S6. Powder X-ray diffraction (PXRD) patterns of UPC-38-NH<sub>2</sub>.

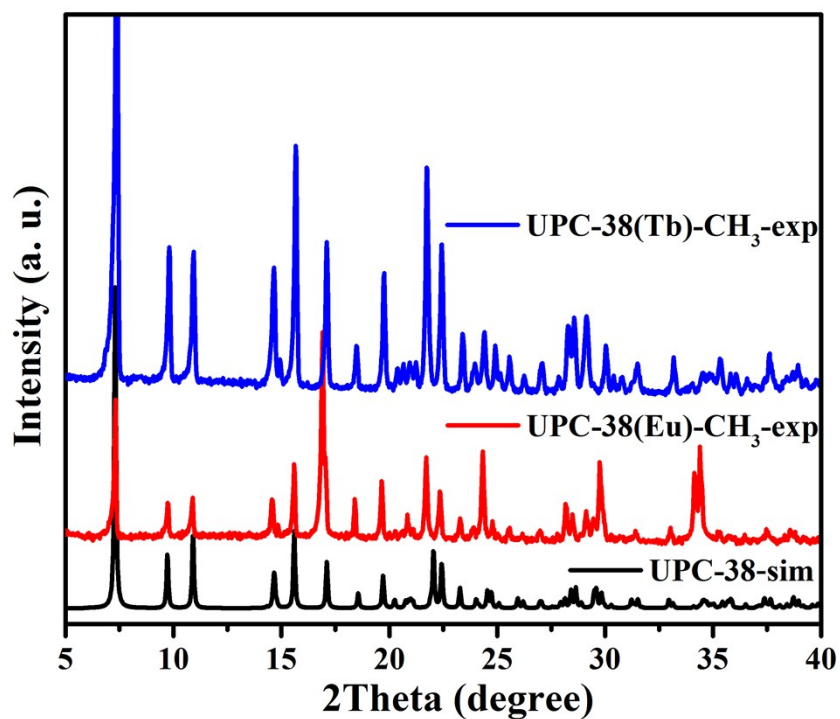

Figure S7. Powder X-ray diffraction (PXRD) patterns of UPC-38-CH<sub>3</sub>.

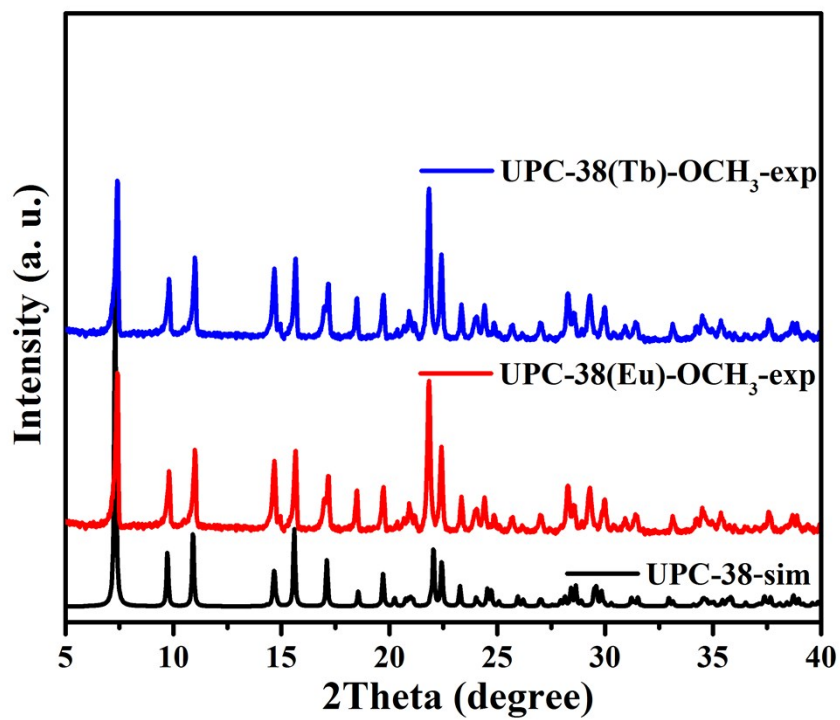

Figure S8. Powder X-ray diffraction (PXRD) patterns of UPC-38-OCH<sub>3</sub>.

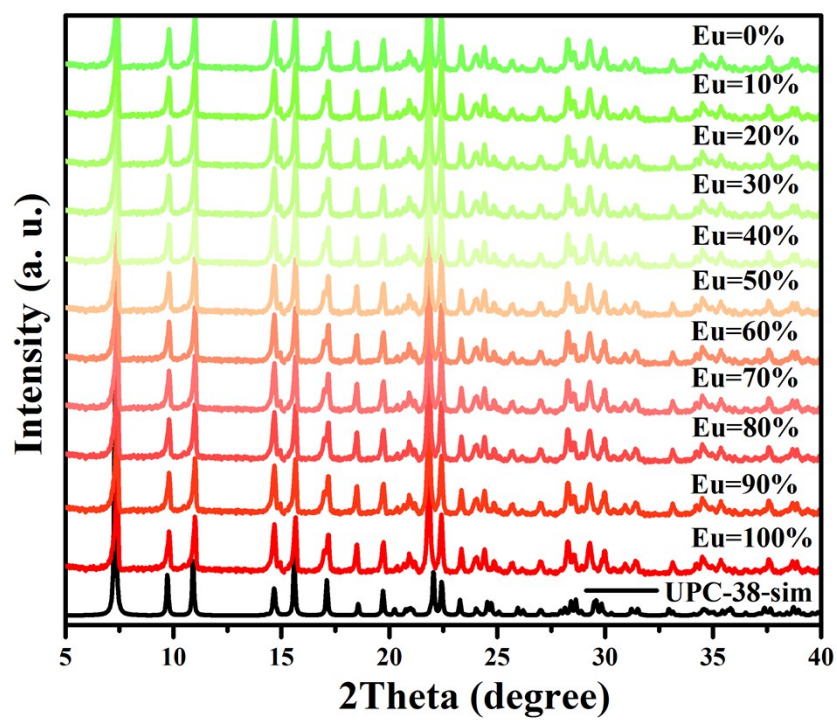

Figure S9. Powder X-ray diffraction (PXRD) patterns of UPC-38(Eu<sub>x</sub>Tb<sub>1-x</sub>)-OCH<sub>3</sub>.



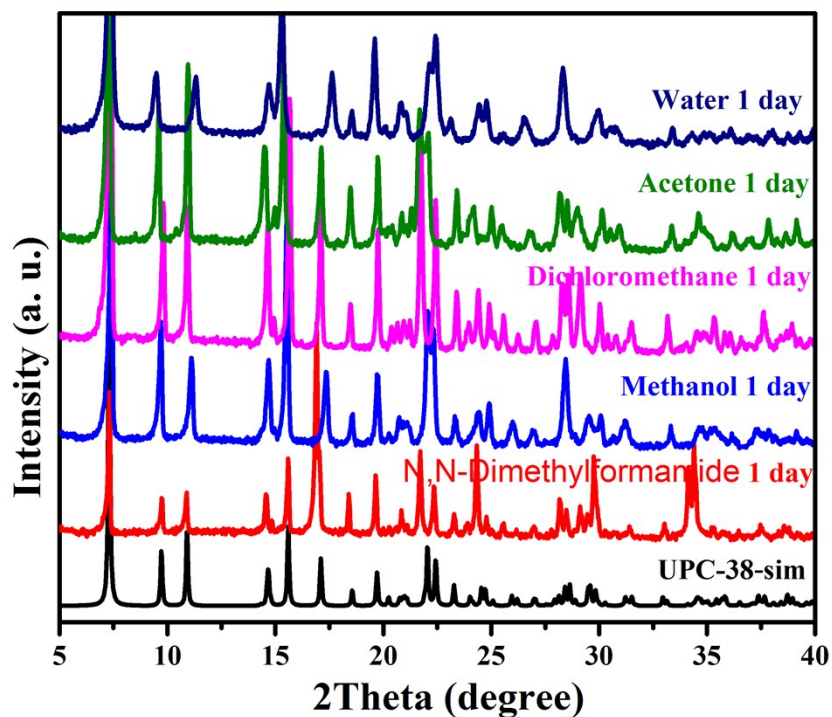

**Figure S10.** Powder X-ray diffraction (PXRD) patterns of UPC-38(Eu<sub>0.33</sub>Tb<sub>0.67</sub>)-OCH<sub>3</sub> showing chemical stability in various solvents.

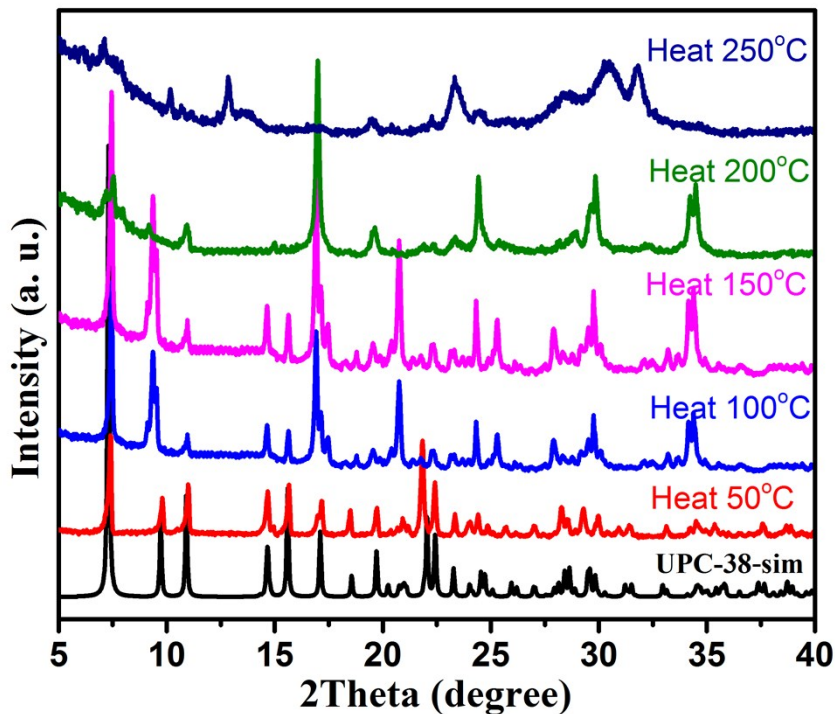

**Figure S11.** Powder X-ray diffraction (PXRD) patterns of UPC-38(Eu<sub>0.33</sub>Tb<sub>0.67</sub>)-OCH<sub>3</sub> showing thermal stability at different temperatures.

## S4. Photoluminescence

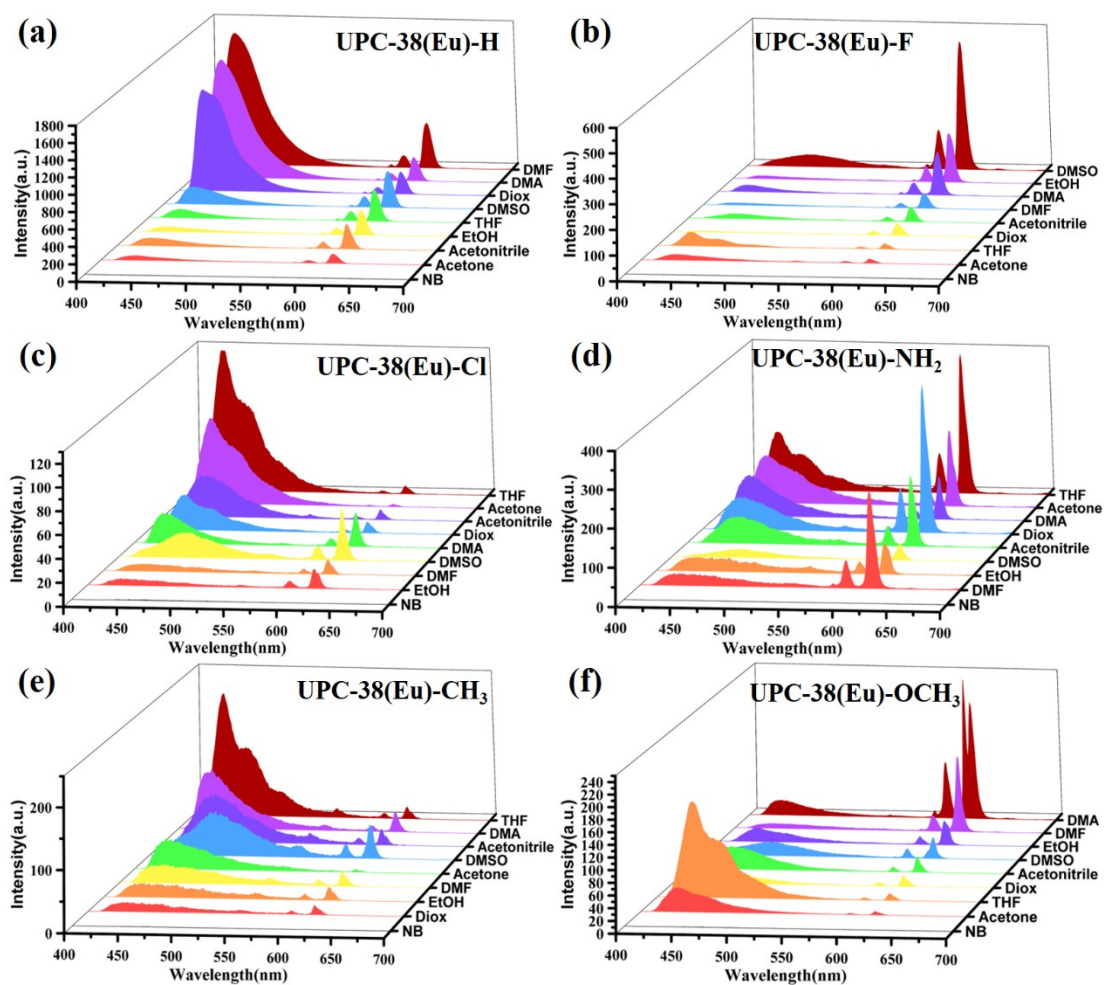

**Figure S12.** PL spectra of UPC-38(Eu)-X (X=H, -F, -Cl, -NH<sub>2</sub>, -CH<sub>3</sub>, -OCH<sub>3</sub>) that was dispersed in different solvents



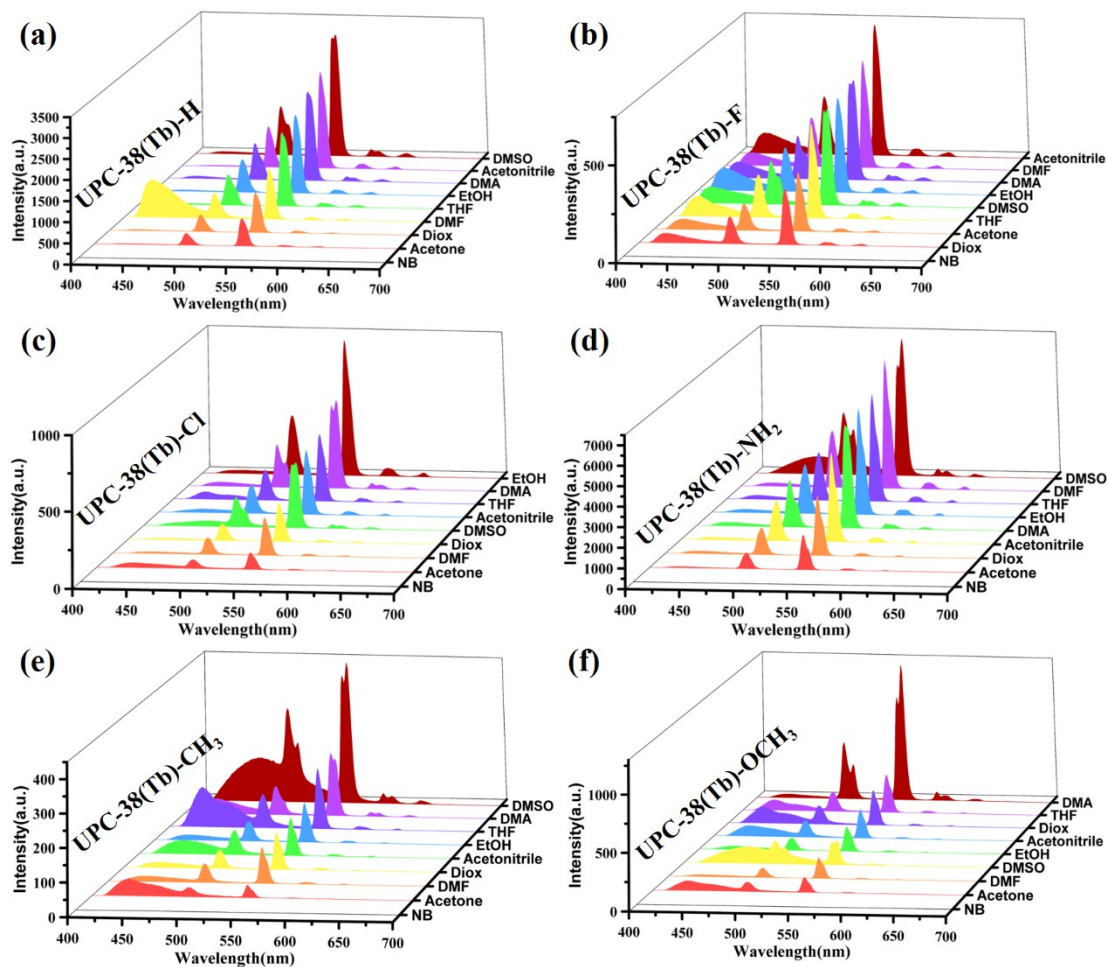

**Figure S13.** PL spectra of UPC-38(Tb)-X (X=H, -F, -Cl, -NH<sub>2</sub>, -CH<sub>3</sub>, -OCH<sub>3</sub>) that was dispersed in different solvents

**Table S2.** The fluorescence quantum yields of UPC-38. <sup>a</sup>

| MOF                                                             | $\Phi_f$ (%) | MOF                                                             | $\Phi_f$ (%) |
|-----------------------------------------------------------------|--------------|-----------------------------------------------------------------|--------------|
| UPC-38(Eu)-H                                                    | 16.64        | UPC-38(Tb)-H                                                    | 28.06        |
| UPC-38(Eu)-F                                                    | 6.93         | UPC-38(Tb)-F                                                    | 8.57         |
| UPC-38(Eu)-Cl                                                   | 2.98         | UPC-38(Tb)-Cl                                                   | 4.89         |
| UPC-38(Eu)-NH <sub>2</sub>                                      | 7.10         | UPC-38(Tb)-NH <sub>2</sub>                                      | 20.22        |
| UPC-38(Eu)-CH <sub>3</sub>                                      | 8.76         | UPC-38(Tb)-CH <sub>3</sub>                                      | 24.09        |
| UPC-38(Eu)-OCH <sub>3</sub>                                     | 9.24         | UPC-38(Tb)-OCH <sub>3</sub>                                     | 24.37        |
| UPC-38(Eu <sub>0.34</sub> Tb <sub>0.66</sub> )-OCH <sub>3</sub> | 13.96        | UPC-38(Eu <sub>0.40</sub> Tb <sub>0.60</sub> )-OCH <sub>3</sub> | 12.53        |

<sup>a</sup> The fluorescence quantum yields measured with an excitation wavelength at 330 nm.

## S5. CIE coordinate calculation

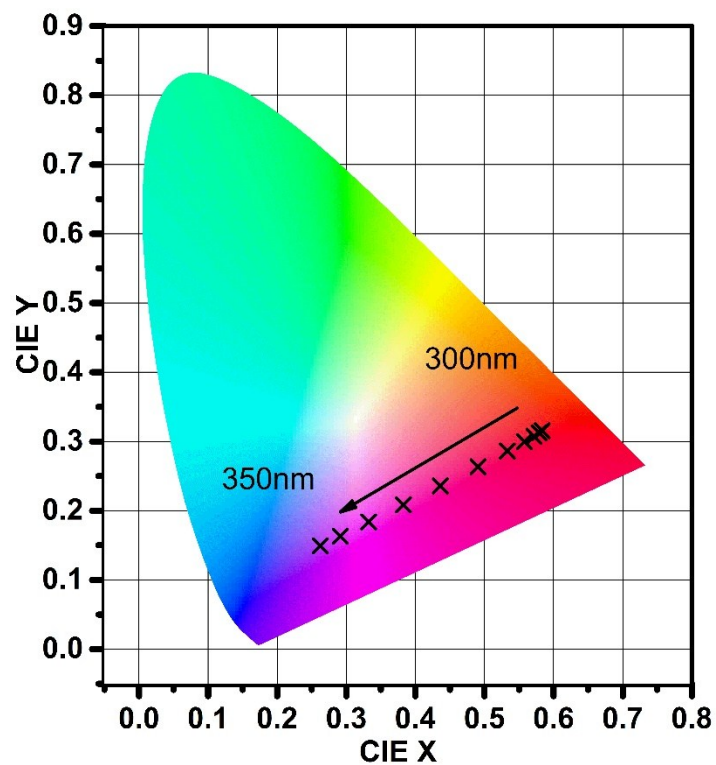

Figure S14. The CIE coordinates of UPC-38(Eu)-OCH<sub>3</sub> at different excitation wavelengths

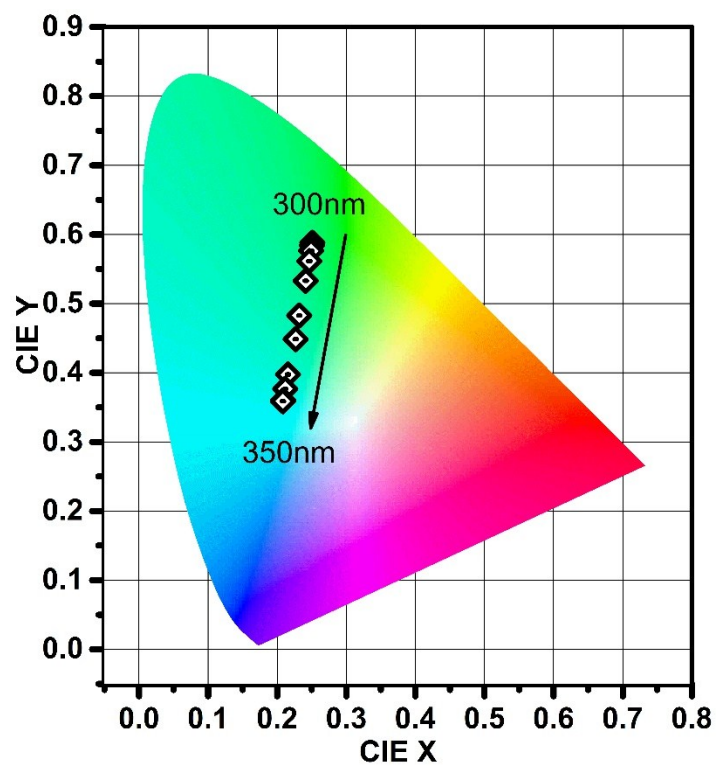

Figure S15. The CIE coordinates of UPC-38(Tb)-OCH<sub>3</sub> at different excitation wavelengths

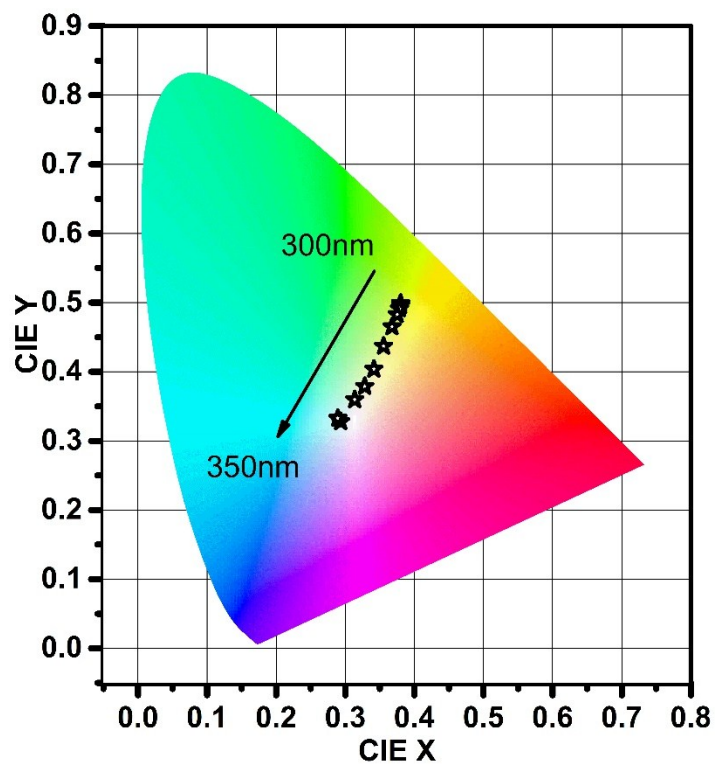

**Figure S16.** The CIE coordinates of UPC-38(Eu<sub>0.25</sub>Tb<sub>0.75</sub>)-OCH<sub>3</sub> at different excitation wavelengths

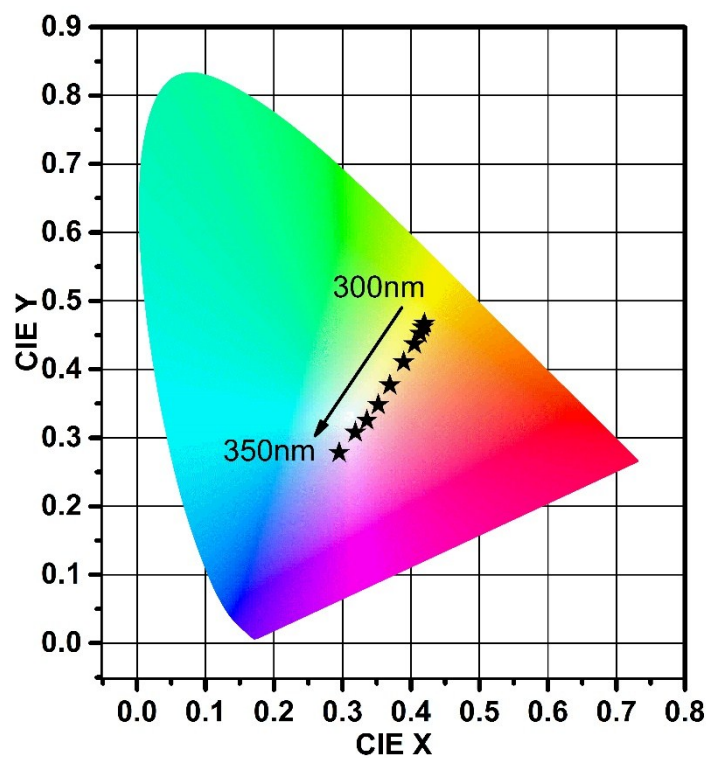

**Figure S17.** The CIE coordinates of UPC-38(Eu<sub>0.34</sub>Tb<sub>0.66</sub>)-OCH<sub>3</sub> at different excitation wavelengths

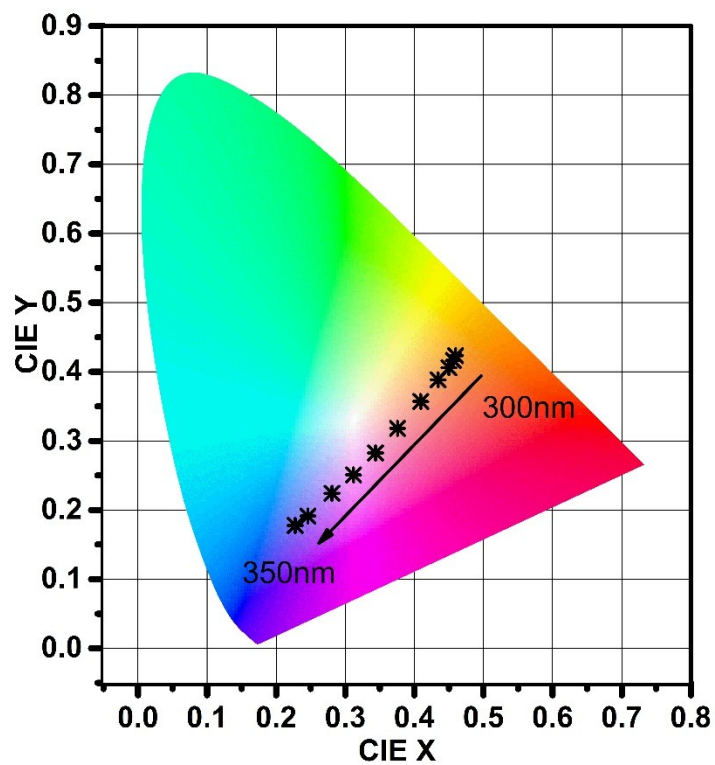

**Figure S18.** The CIE coordinates of UPC-38(Eu<sub>0.4</sub>Tb<sub>0.6</sub>)-OCH<sub>3</sub> at different excitation wavelengths

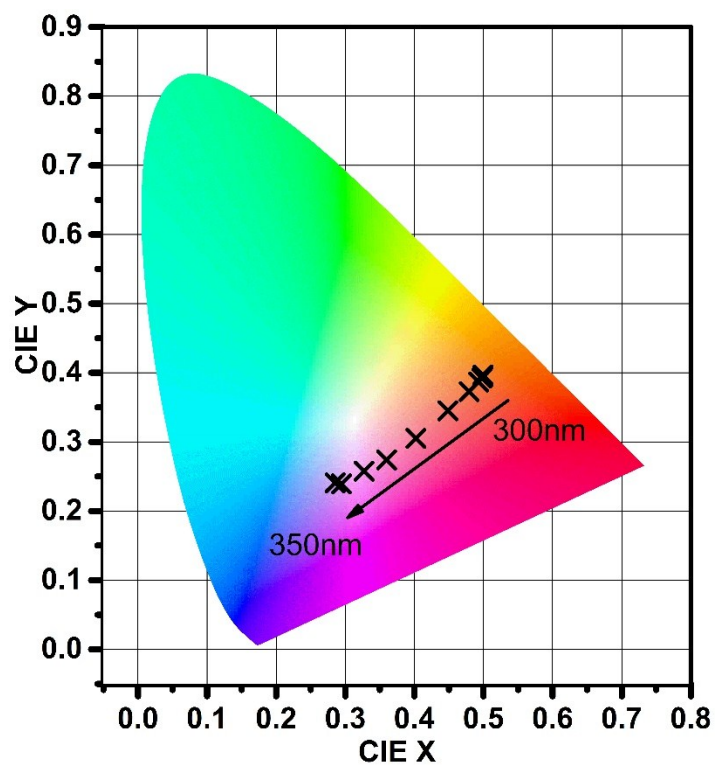

**Figure S19.** The CIE coordinates of UPC-38(Eu<sub>0.49</sub>Tb<sub>0.51</sub>)-OCH<sub>3</sub> at different excitation wavelengths

**Table S3.** The CIE coordinates for **UPC-38** upon 330 nm excitation

| MOF                         | Excitation wavelength(nm) | CIE              |
|-----------------------------|---------------------------|------------------|
| UPC-38(Eu)-OCH <sub>3</sub> | 300                       | (0.5834, 0.3155) |
| UPC-38(Eu)-OCH <sub>3</sub> | 305                       | (0.5790, 0.3125) |
| UPC-38(Eu)-OCH <sub>3</sub> | 310                       | (0.5715, 0.3078) |
| UPC-38(Eu)-OCH <sub>3</sub> | 315                       | (0.5577, 0.2998) |
| UPC-38(Eu)-OCH <sub>3</sub> | 320                       | (0.5329, 0.2862) |
| UPC-38(Eu)-OCH <sub>3</sub> | 325                       | (0.4906, 0.2636) |
| UPC-38(Eu)-OCH <sub>3</sub> | 330                       | (0.4360, 0.2358) |
| UPC-38(Eu)-OCH <sub>3</sub> | 335                       | (0.3827, 0.2086) |
| UPC-38(Eu)-OCH <sub>3</sub> | 340                       | (0.3324, 0.1837) |
| UPC-38(Eu)-OCH <sub>3</sub> | 345                       | (0.2913, 0.1632) |
| UPC-38(Eu)-OCH <sub>3</sub> | 350                       | (0.2624, 0.1493) |

**Table S4.** The CIE coordinates for **UPC-38** upon 330 nm excitation

| MOF                         | Excitation wavelength(nm) | CIE              |
|-----------------------------|---------------------------|------------------|
| UPC-38(Tb)-OCH <sub>3</sub> | 300                       | (0.2507, 0.5879) |
| UPC-38(Tb)-OCH <sub>3</sub> | 305                       | (0.2504, 0.5840) |
| UPC-38(Tb)-OCH <sub>3</sub> | 310                       | (0.2489, 0.5764) |
| UPC-38(Tb)-OCH <sub>3</sub> | 315                       | (0.2464, 0.5616) |
| UPC-38(Tb)-OCH <sub>3</sub> | 320                       | (0.2411, 0.5329) |
| UPC-38(Tb)-OCH <sub>3</sub> | 325                       | (0.2318, 0.4828) |
| UPC-38(Tb)-OCH <sub>3</sub> | 330                       | (0.2266, 0.4486) |
| UPC-38(Tb)-OCH <sub>3</sub> | 335                       | (0.2156, 0.3976) |
| UPC-38(Tb)-OCH <sub>3</sub> | 340                       | (0.2116, 0.3768) |
| UPC-38(Tb)-OCH <sub>3</sub> | 345                       | (0.2085, 0.3603) |
| UPC-38(Tb)-OCH <sub>3</sub> | 350                       | (0.2083, 0.3588) |

**Table S5.** The CIE coordinates for **UPC-38** upon 330 nm excitation

| MOF                                                               | Excitation wavelength(nm) | CIE              |
|-------------------------------------------------------------------|---------------------------|------------------|
| UPC-38(Eu <sub>x</sub> Tb <sub>1-x</sub> )-OCH <sub>3</sub> x=20% | 300                       | (0.3800, 0.4989) |
| UPC-38(Eu <sub>x</sub> Tb <sub>1-x</sub> )-OCH <sub>3</sub> x=20% | 305                       | (0.3800, 0.4957) |
| UPC-38(Eu <sub>x</sub> Tb <sub>1-x</sub> )-OCH <sub>3</sub> x=20% | 310                       | (0.3786, 0.4913) |
| UPC-38(Eu <sub>x</sub> Tb <sub>1-x</sub> )-OCH <sub>3</sub> x=20% | 315                       | (0.3751, 0.4825) |
| UPC-38(Eu <sub>x</sub> Tb <sub>1-x</sub> )-OCH <sub>3</sub> x=20% | 320                       | (0.3676, 0.4651) |
| UPC-38(Eu <sub>x</sub> Tb <sub>1-x</sub> )-OCH <sub>3</sub> x=20% | 325                       | (0.3554, 0.4370) |
| UPC-38(Eu <sub>x</sub> Tb <sub>1-x</sub> )-OCH <sub>3</sub> x=20% | 330                       | (0.3413, 0.4036) |
| UPC-38(Eu <sub>x</sub> Tb <sub>1-x</sub> )-OCH <sub>3</sub> x=20% | 335                       | (0.3281, 0.3787) |
| UPC-38(Eu <sub>x</sub> Tb <sub>1-x</sub> )-OCH <sub>3</sub> x=20% | 340                       | (0.3135, 0.3597) |
| UPC-38(Eu <sub>x</sub> Tb <sub>1-x</sub> )-OCH <sub>3</sub> x=20% | 345                       | (0.2933, 0.3280) |
| UPC-38(Eu <sub>x</sub> Tb <sub>1-x</sub> )-OCH <sub>3</sub> x=20% | 350                       | (0.2893, 0.3327) |

**Table S6.** The CIE coordinates for **UPC-38** upon 330 nm excitation

| MOF                                                               | Excitation wavelength(nm) | CIE              |
|-------------------------------------------------------------------|---------------------------|------------------|
| UPC-38(Eu <sub>x</sub> Tb <sub>1-x</sub> )-OCH <sub>3</sub> x=30% | 300                       | (0.4198, 0.4661) |
| UPC-38(Eu <sub>x</sub> Tb <sub>1-x</sub> )-OCH <sub>3</sub> x=30% | 305                       | (0.4173, 0.4602) |
| UPC-38(Eu <sub>x</sub> Tb <sub>1-x</sub> )-OCH <sub>3</sub> x=30% | 310                       | (0.4136, 0.4511) |
| UPC-38(Eu <sub>x</sub> Tb <sub>1-x</sub> )-OCH <sub>3</sub> x=30% | 315                       | (0.4049, 0.4359) |
| UPC-38(Eu <sub>x</sub> Tb <sub>1-x</sub> )-OCH <sub>3</sub> x=30% | 320                       | (0.3894, 0.4097) |
| UPC-38(Eu <sub>x</sub> Tb <sub>1-x</sub> )-OCH <sub>3</sub> x=30% | 325                       | (0.3691, 0.3759) |
| UPC-38(Eu <sub>x</sub> Tb <sub>1-x</sub> )-OCH <sub>3</sub> x=30% | 330                       | (0.3523, 0.3471) |
| UPC-38(Eu <sub>x</sub> Tb <sub>1-x</sub> )-OCH <sub>3</sub> x=30% | 335                       | (0.3357, 0.3246) |
| UPC-38(Eu <sub>x</sub> Tb <sub>1-x</sub> )-OCH <sub>3</sub> x=30% | 340                       | (0.3188, 0.3070) |
| UPC-38(Eu <sub>x</sub> Tb <sub>1-x</sub> )-OCH <sub>3</sub> x=30% | 345                       | (0.2951, 0.2773) |
| UPC-38(Eu <sub>x</sub> Tb <sub>1-x</sub> )-OCH <sub>3</sub> x=30% | 350                       | (0.2861, 0.2770) |

**Table S7.** The CIE coordinates for **UPC-38** upon 330 nm excitation

| MOF                                                               | Excitation wavelength(nm) | CIE              |
|-------------------------------------------------------------------|---------------------------|------------------|
| UPC-38(Eu <sub>x</sub> Tb <sub>1-x</sub> )-OCH <sub>3</sub> x=40% | 300                       | (0.4596, 0.4231) |
| UPC-38(Eu <sub>x</sub> Tb <sub>1-x</sub> )-OCH <sub>3</sub> x=40% | 305                       | (0.4564, 0.4165) |
| UPC-38(Eu <sub>x</sub> Tb <sub>1-x</sub> )-OCH <sub>3</sub> x=40% | 310                       | (0.4499, 0.4059) |
| UPC-38(Eu <sub>x</sub> Tb <sub>1-x</sub> )-OCH <sub>3</sub> x=40% | 315                       | (0.4342, 0.3883) |
| UPC-38(Eu <sub>x</sub> Tb <sub>1-x</sub> )-OCH <sub>3</sub> x=40% | 320                       | (0.4091, 0.3569) |
| UPC-38(Eu <sub>x</sub> Tb <sub>1-x</sub> )-OCH <sub>3</sub> x=40% | 325                       | (0.3756, 0.3181) |
| UPC-38(Eu <sub>x</sub> Tb <sub>1-x</sub> )-OCH <sub>3</sub> x=40% | 330                       | (0.3438, 0.2824) |
| UPC-38(Eu <sub>x</sub> Tb <sub>1-x</sub> )-OCH <sub>3</sub> x=40% | 335                       | (0.3119, 0.2509) |
| UPC-38(Eu <sub>x</sub> Tb <sub>1-x</sub> )-OCH <sub>3</sub> x=40% | 340                       | (0.2809, 0.2241) |
| UPC-38(Eu <sub>x</sub> Tb <sub>1-x</sub> )-OCH <sub>3</sub> x=40% | 345                       | (0.2460, 0.1915) |
| UPC-38(Eu <sub>x</sub> Tb <sub>1-x</sub> )-OCH <sub>3</sub> x=40% | 350                       | (0.2274, 0.1777) |

**Table S8.** The CIE coordinates for **UPC-38** upon 330 nm excitation

| MOF                                                               | Excitation wavelength(nm) | CIE              |
|-------------------------------------------------------------------|---------------------------|------------------|
| UPC-38(Eu <sub>x</sub> Tb <sub>1-x</sub> )-OCH <sub>3</sub> x=50% | 300                       | (0.4991, 0.3966) |
| UPC-38(Eu <sub>x</sub> Tb <sub>1-x</sub> )-OCH <sub>3</sub> x=50% | 305                       | (0.4995, 0.3950) |
| UPC-38(Eu <sub>x</sub> Tb <sub>1-x</sub> )-OCH <sub>3</sub> x=50% | 310                       | (0.4976, 0.3927) |
| UPC-38(Eu <sub>x</sub> Tb <sub>1-x</sub> )-OCH <sub>3</sub> x=50% | 315                       | (0.4926, 0.3923) |
| UPC-38(Eu <sub>x</sub> Tb <sub>1-x</sub> )-OCH <sub>3</sub> x=50% | 320                       | (0.4791, 0.3727) |
| UPC-38(Eu <sub>x</sub> Tb <sub>1-x</sub> )-OCH <sub>3</sub> x=50% | 325                       | (0.4484, 0.3450) |
| UPC-38(Eu <sub>x</sub> Tb <sub>1-x</sub> )-OCH <sub>3</sub> x=50% | 330                       | (0.4021, 0.3052) |
| UPC-38(Eu <sub>x</sub> Tb <sub>1-x</sub> )-OCH <sub>3</sub> x=50% | 335                       | (0.3597, 0.2740) |
| UPC-38(Eu <sub>x</sub> Tb <sub>1-x</sub> )-OCH <sub>3</sub> x=50% | 340                       | (0.3270, 0.2575) |
| UPC-38(Eu <sub>x</sub> Tb <sub>1-x</sub> )-OCH <sub>3</sub> x=50% | 345                       | (0.2945, 0.2393) |
| UPC-38(Eu <sub>x</sub> Tb <sub>1-x</sub> )-OCH <sub>3</sub> x=50% | 350                       | (0.2854, 0.2406) |

## S6. ICP Analysis

Table S9

| MOF                                                                | Metal ratios from starting material preparation | Metal ratios from ICP of digested sample | x    |
|--------------------------------------------------------------------|-------------------------------------------------|------------------------------------------|------|
| UPC-38(Eu <sub>x</sub> Tb <sub>1-x</sub> )-OCH <sub>3</sub> x=0%   | Eu : Tb=0:1                                     | Eu : Tb=0:1                              | 0    |
| UPC-38(Eu <sub>x</sub> Tb <sub>1-x</sub> )-OCH <sub>3</sub> x=10%  | Eu : Tb=1:9                                     | Eu : Tb=0.27:1                           | 0.21 |
| UPC-38(Eu <sub>x</sub> Tb <sub>1-x</sub> )-OCH <sub>3</sub> x=20%  | Eu : Tb=2:8                                     | Eu : Tb=0.33:1                           | 0.25 |
| UPC-38(Eu <sub>x</sub> Tb <sub>1-x</sub> )-OCH <sub>3</sub> x=30%  | Eu : Tb=3:7                                     | Eu : Tb=0.51:1                           | 0.34 |
| UPC-38(Eu <sub>x</sub> Tb <sub>1-x</sub> )-OCH <sub>3</sub> x=40%  | Eu : Tb=4:6                                     | Eu : Tb=0.65:1                           | 0.40 |
| UPC-38(Eu <sub>x</sub> Tb <sub>1-x</sub> )-OCH <sub>3</sub> x=50%  | Eu : Tb=5:5                                     | Eu : Tb=0.95:1                           | 0.49 |
| UPC-38(Eu <sub>x</sub> Tb <sub>1-x</sub> )-OCH <sub>3</sub> x=60%  | Eu : Tb=6:4                                     | Eu : Tb=1.32:1                           | 0.56 |
| UPC-38(Eu <sub>x</sub> Tb <sub>1-x</sub> )-OCH <sub>3</sub> x=70%  | Eu : Tb=7:3                                     | Eu : Tb=1.94:1                           | 0.66 |
| UPC-38(Eu <sub>x</sub> Tb <sub>1-x</sub> )-OCH <sub>3</sub> x=80%  | Eu : Tb=8:2                                     | Eu : Tb=3.56:1                           | 0.78 |
| UPC-38(Eu <sub>x</sub> Tb <sub>1-x</sub> )-OCH <sub>3</sub> x=90%  | Eu : Tb=9:1                                     | Eu : Tb=7.66:1                           | 0.88 |
| UPC-38(Eu <sub>x</sub> Tb <sub>1-x</sub> )-OCH <sub>3</sub> x=100% | Eu : Tb=1:0                                     | Eu : Tb=1:0                              | 1    |

## S7. IR Spectrum

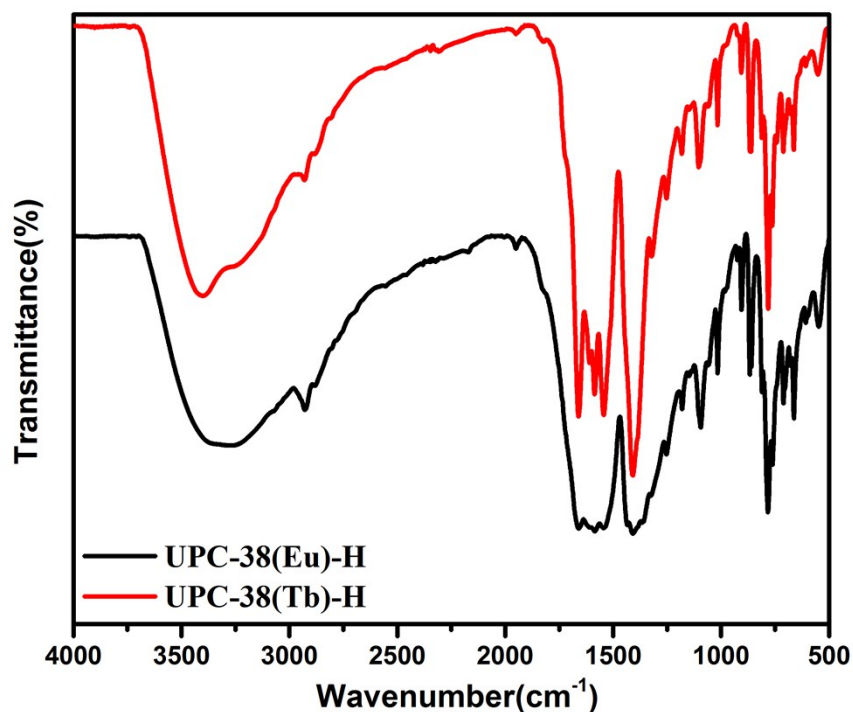

Figure S20. IR spectrum of UPC-38-H.



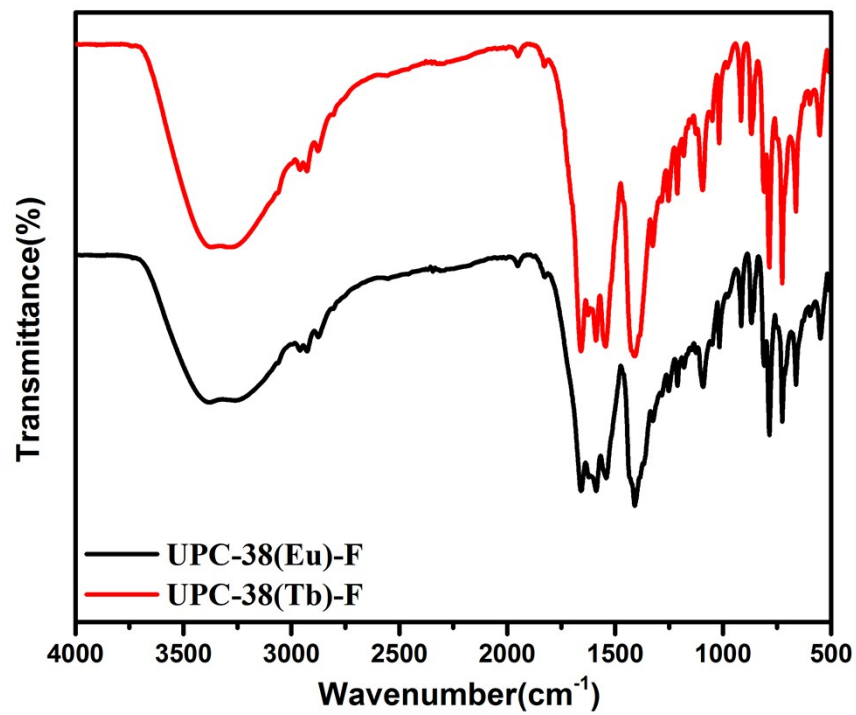

Figure S21. IR spectrum of UPC-38-F.

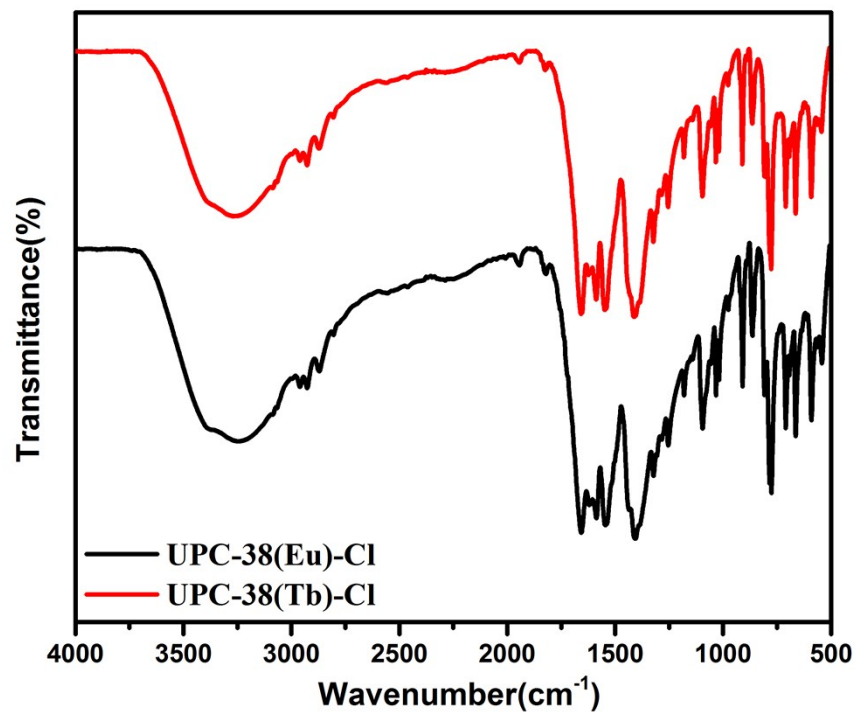

Figure S22. IR spectrum of UPC-38-Cl.



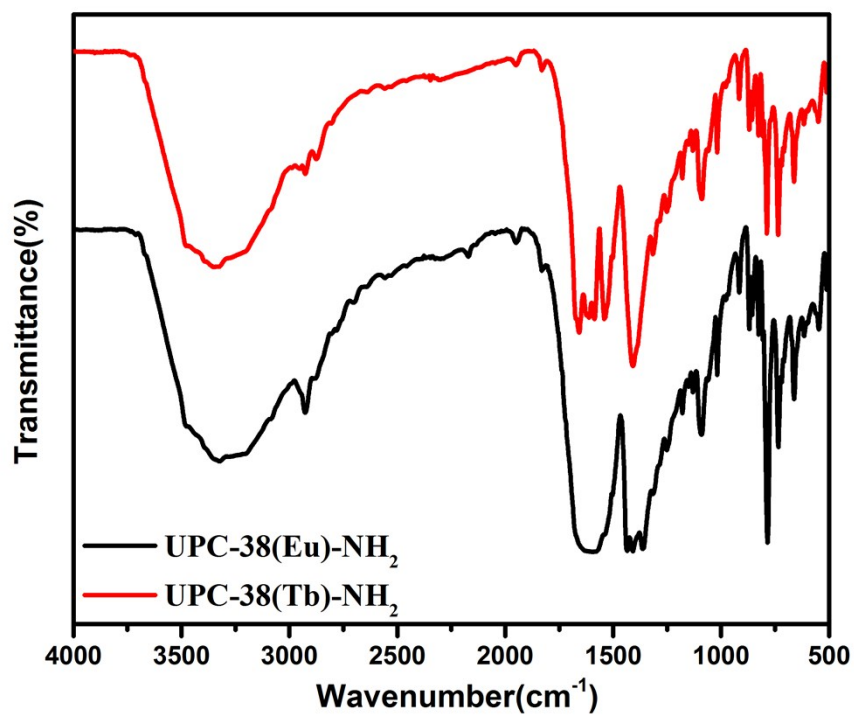

Figure S23. IR spectrum of UPC-38-NH<sub>2</sub>.

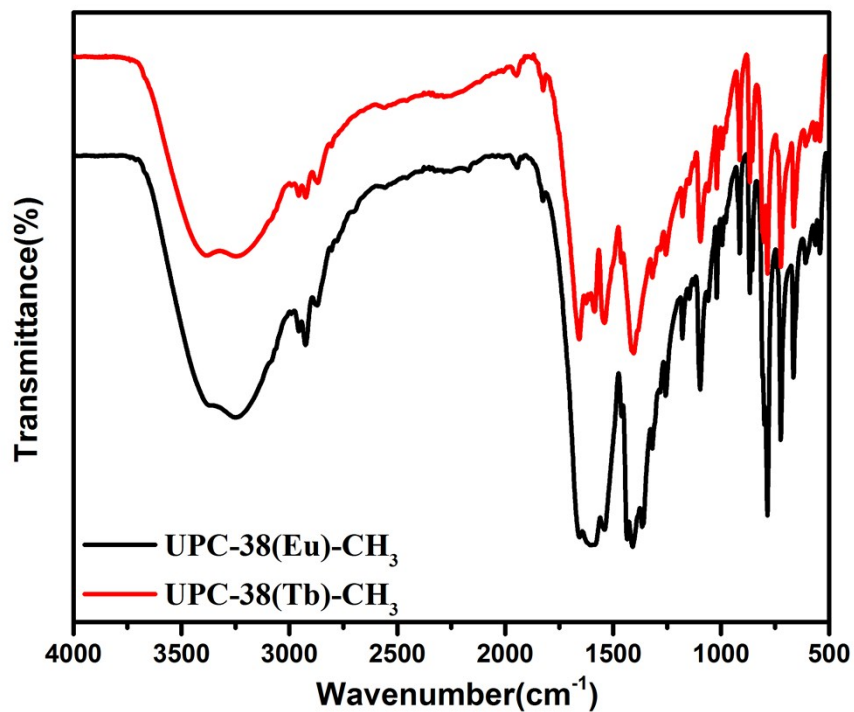

Figure S24. IR spectrum of UPC-38-CH<sub>3</sub>.

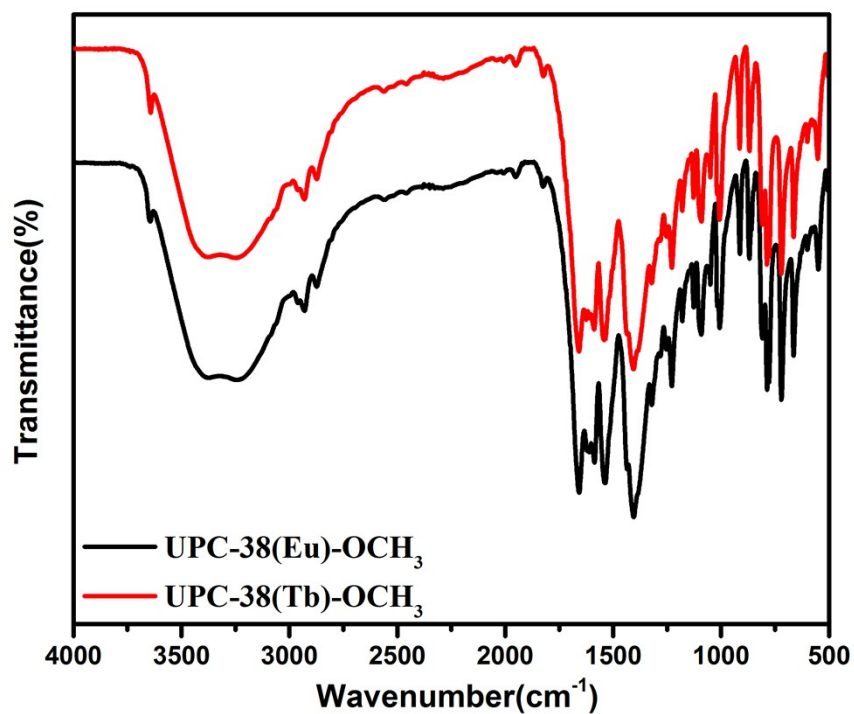

Figure S25. IR spectrum of UPC-38-OCH<sub>3</sub>.

### S8. Thermogravimetric Analysis

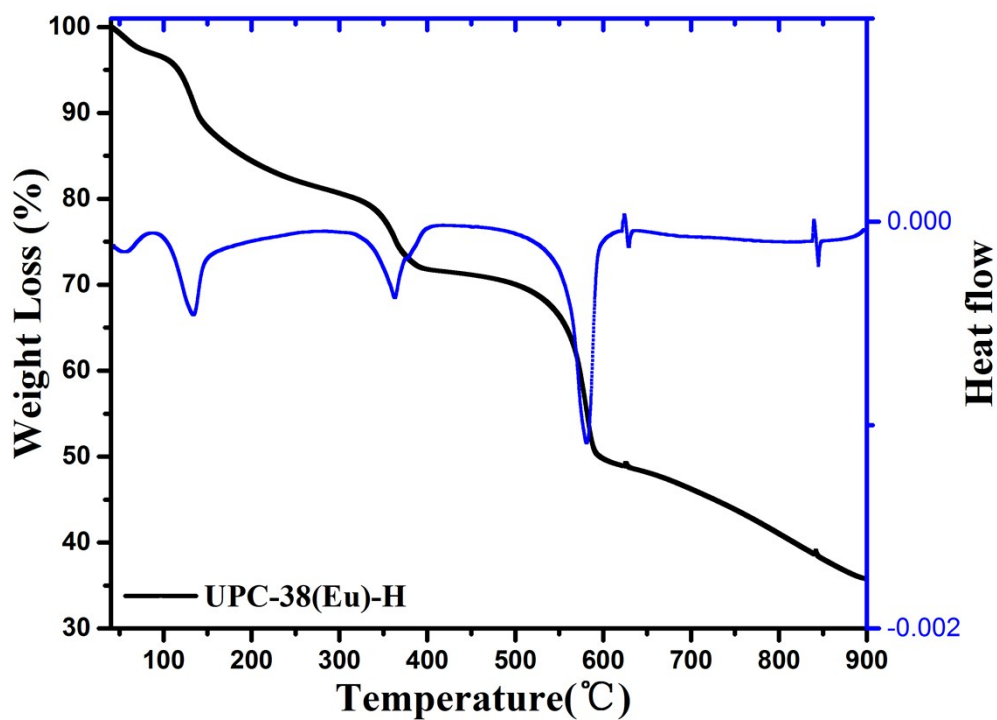

Figure S26. TGA plots of UPC-38(Eu)-H.

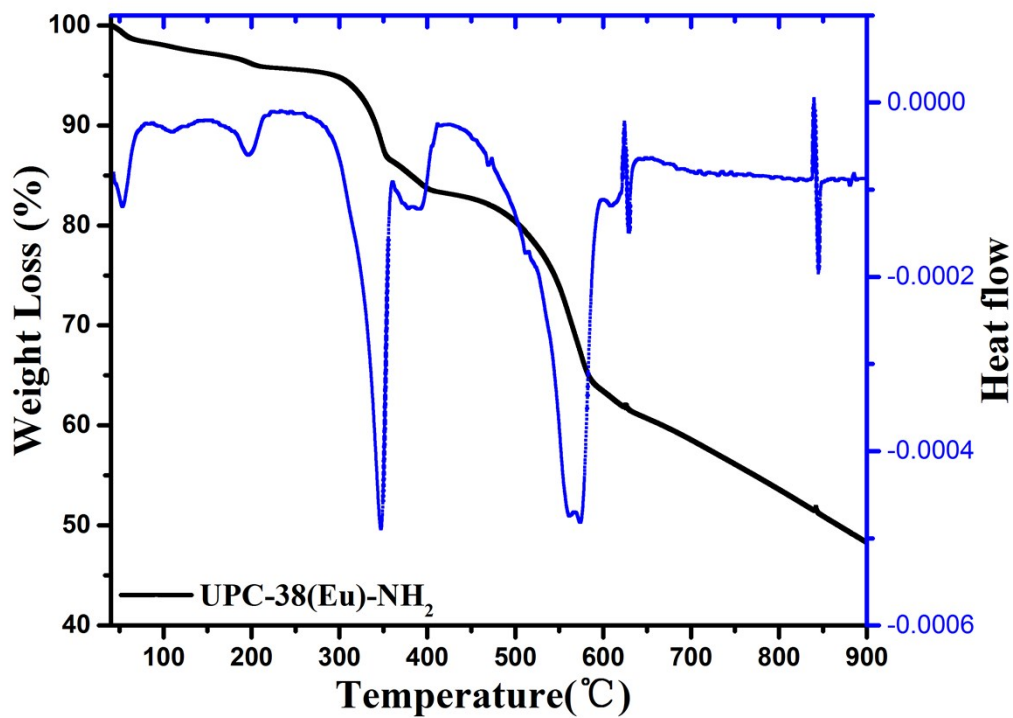

Figure S27. TGA-DSC plot of UPC-38(Eu)-NH<sub>2</sub>.

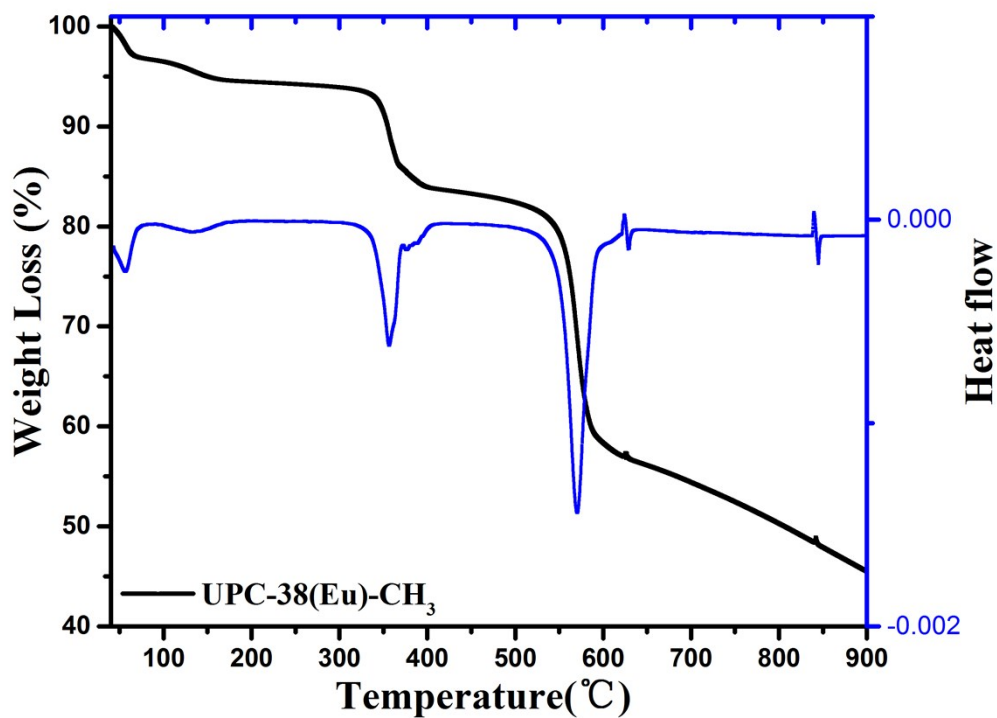

Figure S28. TGA-DSC plot of UPC-38(Eu)-CH<sub>3</sub>.

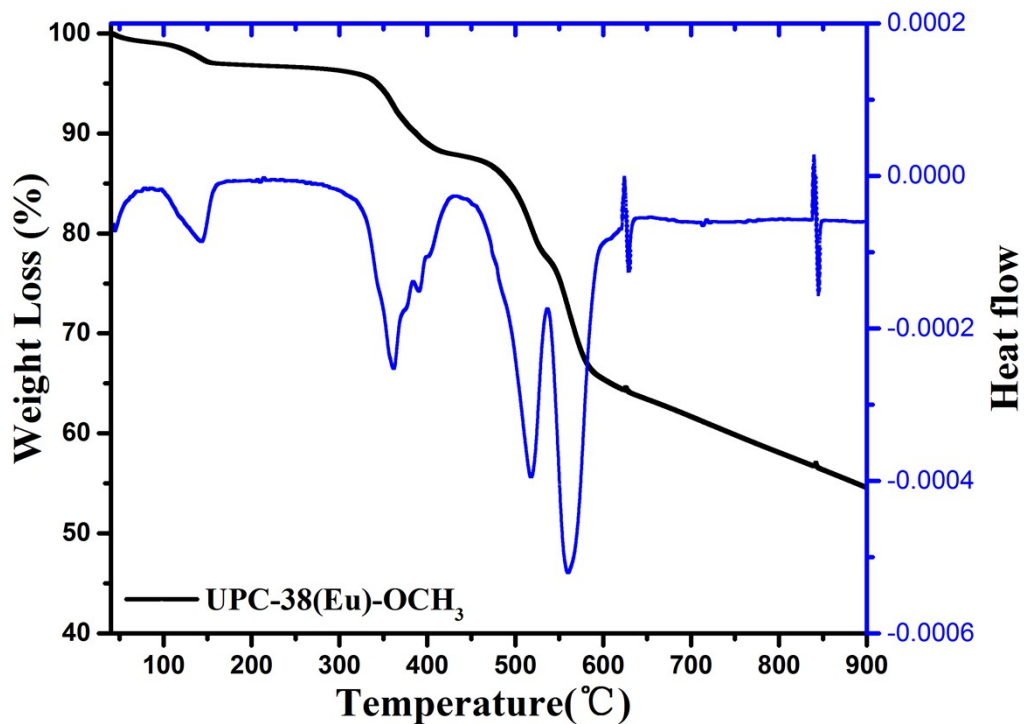

Figure S29. TGA-DSC plot of UPC-38(Eu)-OCH<sub>3</sub>.

### S9. UV-vis adsorption and Solid-state emission spectra

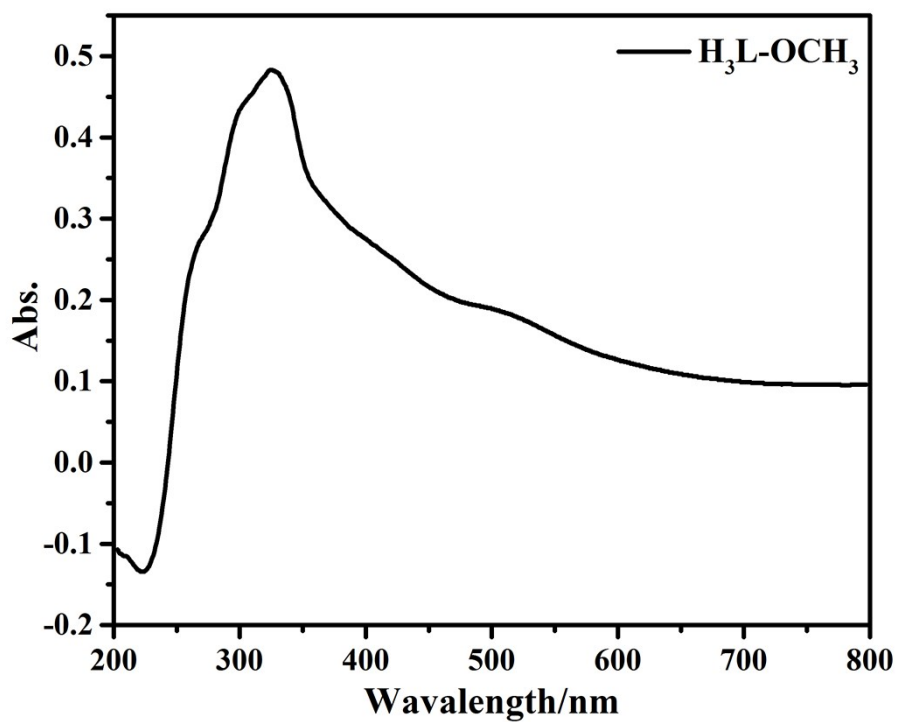

Figure S30. UV -vis adsorption spectra of H<sub>3</sub>L-OCH<sub>3</sub> in the solid state at room temperature.

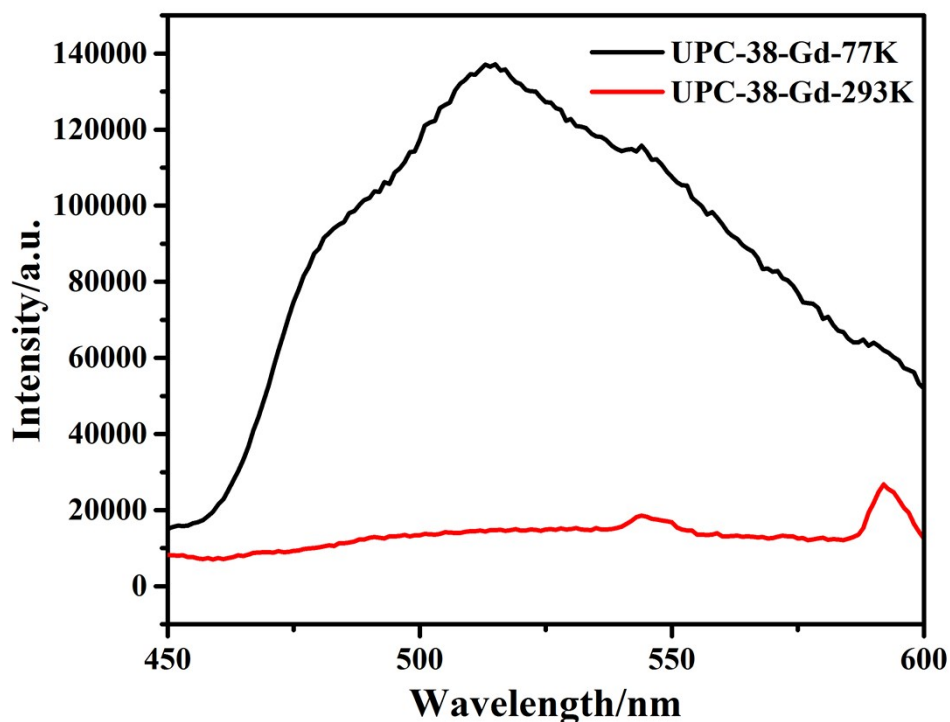

**Figure S31.** Solid-state emission spectra of complex UPC-38(Gd)-OCH<sub>3</sub> at 77K and 293K.

## S10. Topology Analysis

CRYSTAL

NAME zkf(UPC-38)

GROUP P1

CELL 3.81017 6.25127 1.99638 90.0000 102.9389 90.0000

NODE 1 3 0.00000 0.22693 0.25000

NODE 2 3 0.00000 0.77307 0.75000

NODE 3 3 0.50000 0.72693 0.25000

NODE 4 3 0.50000 0.27307 0.75000

NODE 5 3 0.13455 0.08848 0.30797

NODE 6 3 0.36545 0.58848 0.19203

NODE 7 3 0.36545 0.41152 0.69203

NODE 8 3 0.86545 0.08848 0.19203

NODE 9 3 0.63455 0.58848 0.30797

NODE 10 3 0.63455 0.41152 0.80797

NODE 11 3 0.13455 0.91152 0.80797

NODE 12 3 0.86545 0.91152 0.69203

NODE 13 6 0.13266 0.50772 0.09049

NODE 14 6 0.36734 0.00772 0.40951

NODE 15 6 0.63266 0.00772 0.09049

NODE 16 6 0.13266 0.49228 0.59049

NODE 17 6 0.86734 0.50772 0.40951

NODE 18 6 0.63266 0.99228 0.59049

NODE 19 6 0.86734 0.49228 0.90951  
NODE 20 6 0.36734 0.99228 0.90951  
NODE 21 5 0.00000 0.38707 0.25000  
NODE 22 5 0.00000 0.61293 0.75000  
NODE 23 5 0.50000 0.11293 0.75000  
NODE 24 5 0.50000 0.88707 0.25000  
EDGE 0.13266 0.50772 0.09049 -0.13266 0.49228 -0.09049  
EDGE 0.36734 0.00772 0.40951 0.63266 -0.00772 0.59049  
EDGE 0.63266 0.00772 0.09049 0.36734 -0.00772 -0.09049  
EDGE 0.13266 0.49228 0.59049 -0.13266 0.50772 0.40951  
EDGE 0.86734 0.50772 0.40951 1.13266 0.49228 0.59049  
EDGE 0.63266 0.99228 0.59049 0.36734 1.00772 0.40951  
EDGE 0.86734 0.49228 0.90951 1.13266 0.50772 1.09049  
EDGE 0.36734 0.99228 0.90951 0.63266 1.00772 1.09049  
EDGE 0.00000 0.22693 0.25000 0.13455 0.08848 0.30797  
EDGE 0.00000 0.22693 0.25000 -0.13455 0.08848 0.19203  
EDGE 0.00000 0.77307 0.75000 0.13455 0.91152 0.80797  
EDGE 0.00000 0.77307 0.75000 -0.13455 0.91152 0.69203  
EDGE 0.13455 0.08848 0.30797 0.00000 0.22693 0.25000  
EDGE 0.36545 0.58848 0.19203 0.50000 0.72693 0.25000  
EDGE 0.36545 0.41152 0.69203 0.50000 0.27307 0.75000  
EDGE 0.86545 0.08848 0.19203 1.00000 0.22693 0.25000  
EDGE 0.50000 0.72693 0.25000 0.36545 0.58848 0.19203  
EDGE 0.50000 0.72693 0.25000 0.63455 0.58848 0.30797  
EDGE 0.63455 0.58848 0.30797 0.50000 0.72693 0.25000  
EDGE 0.50000 0.27307 0.75000 0.36545 0.41152 0.69203  
EDGE 0.50000 0.27307 0.75000 0.63455 0.41152 0.80797  
EDGE 0.63455 0.41152 0.80797 0.50000 0.27307 0.75000  
EDGE 0.13455 0.91152 0.80797 0.00000 0.77307 0.75000  
EDGE 0.86545 0.91152 0.69203 1.00000 0.77307 0.75000  
EDGE 0.13455 0.08848 0.30797 0.36734 0.00772 0.40951  
EDGE 0.13266 0.50772 0.09049 0.36545 0.58848 0.19203  
EDGE 0.36734 0.00772 0.40951 0.13455 0.08848 0.30797  
EDGE 0.63266 0.00772 0.09049 0.86545 0.08848 0.19203  
EDGE 0.36545 0.58848 0.19203 0.13266 0.50772 0.09049  
EDGE 0.13266 0.49228 0.59049 0.36545 0.41152 0.69203  
EDGE 0.36545 0.41152 0.69203 0.13266 0.49228 0.59049  
EDGE 0.86545 0.08848 0.19203 0.63266 0.00772 0.09049  
EDGE 0.63455 0.58848 0.30797 0.86734 0.50772 0.40951  
EDGE 0.86734 0.50772 0.40951 0.63455 0.58848 0.30797  
EDGE 0.63455 0.41152 0.80797 0.86734 0.49228 0.90951  
EDGE 0.13455 0.91152 0.80797 0.36734 0.99228 0.90951  
EDGE 0.63266 0.99228 0.59049 0.86545 0.91152 0.69203  
EDGE 0.86734 0.49228 0.90951 0.63455 0.41152 0.80797

|      |         |         |         |          |          |          |
|------|---------|---------|---------|----------|----------|----------|
| EDGE | 0.36734 | 0.99228 | 0.90951 | 0.13455  | 0.91152  | 0.80797  |
| EDGE | 0.86545 | 0.91152 | 0.69203 | 0.63266  | 0.99228  | 0.59049  |
| EDGE | 0.00000 | 0.38707 | 0.25000 | 0.13266  | 0.50772  | 0.09049  |
| EDGE | 0.00000 | 0.38707 | 0.25000 | -0.13266 | 0.50772  | 0.40951  |
| EDGE | 0.00000 | 0.61293 | 0.75000 | 0.13266  | 0.49228  | 0.59049  |
| EDGE | 0.00000 | 0.61293 | 0.75000 | -0.13266 | 0.49228  | 0.90951  |
| EDGE | 0.13266 | 0.50772 | 0.09049 | 0.00000  | 0.38707  | 0.25000  |
| EDGE | 0.36734 | 0.00772 | 0.40951 | 0.50000  | -0.11293 | 0.25000  |
| EDGE | 0.63266 | 0.00772 | 0.09049 | 0.50000  | -0.11293 | 0.25000  |
| EDGE | 0.13266 | 0.49228 | 0.59049 | 0.00000  | 0.61293  | 0.75000  |
| EDGE | 0.50000 | 0.11293 | 0.75000 | 0.63266  | -0.00772 | 0.59049  |
| EDGE | 0.50000 | 0.11293 | 0.75000 | 0.36734  | -0.00772 | 0.90951  |
| EDGE | 0.50000 | 0.88707 | 0.25000 | 0.36734  | 1.00772  | 0.40951  |
| EDGE | 0.50000 | 0.88707 | 0.25000 | 0.63266  | 1.00772  | 0.09049  |
| EDGE | 0.86734 | 0.50772 | 0.40951 | 1.00000  | 0.38707  | 0.25000  |
| EDGE | 0.63266 | 0.99228 | 0.59049 | 0.50000  | 1.11293  | 0.75000  |
| EDGE | 0.86734 | 0.49228 | 0.90951 | 1.00000  | 0.61293  | 0.75000  |
| EDGE | 0.36734 | 0.99228 | 0.90951 | 0.50000  | 1.11293  | 0.75000  |
| EDGE | 0.00000 | 0.38707 | 0.25000 | 0.13266  | 0.49228  | 0.59049  |
| EDGE | 0.00000 | 0.38707 | 0.25000 | -0.13266 | 0.49228  | -0.09049 |
| EDGE | 0.00000 | 0.61293 | 0.75000 | 0.13266  | 0.50772  | 1.09049  |
| EDGE | 0.00000 | 0.61293 | 0.75000 | -0.13266 | 0.50772  | 0.40951  |
| EDGE | 0.13266 | 0.50772 | 0.09049 | 0.00000  | 0.61293  | -0.25000 |
| EDGE | 0.36734 | 0.00772 | 0.40951 | 0.50000  | 0.11293  | 0.75000  |
| EDGE | 0.63266 | 0.00772 | 0.09049 | 0.50000  | 0.11293  | -0.25000 |
| EDGE | 0.13266 | 0.49228 | 0.59049 | 0.00000  | 0.38707  | 0.25000  |
| EDGE | 0.50000 | 0.11293 | 0.75000 | 0.36734  | 0.00772  | 0.40951  |
| EDGE | 0.50000 | 0.11293 | 0.75000 | 0.63266  | 0.00772  | 1.09049  |
| EDGE | 0.50000 | 0.88707 | 0.25000 | 0.36734  | 0.99228  | -0.09049 |
| EDGE | 0.50000 | 0.88707 | 0.25000 | 0.63266  | 0.99228  | 0.59049  |
| EDGE | 0.86734 | 0.50772 | 0.40951 | 1.00000  | 0.61293  | 0.75000  |
| EDGE | 0.63266 | 0.99228 | 0.59049 | 0.50000  | 0.88707  | 0.25000  |
| EDGE | 0.86734 | 0.49228 | 0.90951 | 1.00000  | 0.38707  | 1.25000  |
| EDGE | 0.36734 | 0.99228 | 0.90951 | 0.50000  | 0.88707  | 1.25000  |
| EDGE | 0.13266 | 0.50772 | 0.09049 | 0.13266  | 0.49228  | -0.40951 |
| EDGE | 0.13266 | 0.50772 | 0.09049 | 0.13266  | 0.49228  | 0.59049  |
| EDGE | 0.36734 | 0.00772 | 0.40951 | 0.36734  | -0.00772 | -0.09049 |
| EDGE | 0.36734 | 0.00772 | 0.40951 | 0.36734  | -0.00772 | 0.90951  |
| EDGE | 0.63266 | 0.00772 | 0.09049 | 0.63266  | -0.00772 | -0.40951 |
| EDGE | 0.63266 | 0.00772 | 0.09049 | 0.63266  | -0.00772 | 0.59049  |
| EDGE | 0.13266 | 0.49228 | 0.59049 | 0.13266  | 0.50772  | 0.09049  |
| EDGE | 0.13266 | 0.49228 | 0.59049 | 0.13266  | 0.50772  | 1.09049  |
| EDGE | 0.86734 | 0.50772 | 0.40951 | 0.86734  | 0.49228  | -0.09049 |
| EDGE | 0.86734 | 0.50772 | 0.40951 | 0.86734  | 0.49228  | 0.90951  |

|               |          |         |          |          |         |         |
|---------------|----------|---------|----------|----------|---------|---------|
| EDGE          | 0.63266  | 0.99228 | 0.59049  | 0.63266  | 1.00772 | 0.09049 |
| EDGE          | 0.63266  | 0.99228 | 0.59049  | 0.63266  | 1.00772 | 1.09049 |
| EDGE          | 0.86734  | 0.49228 | 0.90951  | 0.86734  | 0.50772 | 0.40951 |
| EDGE          | 0.86734  | 0.49228 | 0.90951  | 0.86734  | 0.50772 | 1.40951 |
| EDGE          | 0.36734  | 0.99228 | 0.90951  | 0.36734  | 1.00772 | 0.40951 |
| EDGE          | 0.36734  | 0.99228 | 0.90951  | 0.36734  | 1.00772 | 1.40951 |
| EDGE          | 0.13455  | 0.08848 | 0.30797  | -0.13455 | 0.08848 | 0.19203 |
| EDGE          | 0.36545  | 0.58848 | 0.19203  | 0.63455  | 0.58848 | 0.30797 |
| EDGE          | 0.36545  | 0.41152 | 0.69203  | 0.63455  | 0.41152 | 0.80797 |
| EDGE          | 0.86545  | 0.08848 | 0.19203  | 1.13455  | 0.08848 | 0.30797 |
| EDGE          | 0.63455  | 0.58848 | 0.30797  | 0.36545  | 0.58848 | 0.19203 |
| EDGE          | 0.63455  | 0.41152 | 0.80797  | 0.36545  | 0.41152 | 0.69203 |
| EDGE          | 0.13455  | 0.91152 | 0.80797  | -0.13455 | 0.91152 | 0.69203 |
| EDGE          | 0.86545  | 0.91152 | 0.69203  | 1.13455  | 0.91152 | 0.80797 |
| EDGE          | 0.00000  | 0.22693 | 0.25000  | 0.00000  | 0.38707 | 0.25000 |
| EDGE          | 0.00000  | 0.38707 | 0.25000  | 0.00000  | 0.22693 | 0.25000 |
| EDGE          | 0.00000  | 0.61293 | 0.75000  | 0.00000  | 0.77307 | 0.75000 |
| EDGE          | 0.00000  | 0.77307 | 0.75000  | 0.00000  | 0.61293 | 0.75000 |
| EDGE          | 0.50000  | 0.11293 | 0.75000  | 0.50000  | 0.27307 | 0.75000 |
| EDGE          | 0.50000  | 0.72693 | 0.25000  | 0.50000  | 0.88707 | 0.25000 |
| EDGE          | 0.50000  | 0.27307 | 0.75000  | 0.50000  | 0.11293 | 0.75000 |
| EDGE          | 0.50000  | 0.88707 | 0.25000  | 0.50000  | 0.72693 | 0.25000 |
| # EDGE_CENTER | 0.00000  | 0.50000 | -0.00000 |          |         |         |
| # EDGE_CENTER | 0.50000  | 0.00000 | 0.50000  |          |         |         |
| # EDGE_CENTER | 0.50000  | 0.00000 | -0.00000 |          |         |         |
| # EDGE_CENTER | 0.00000  | 0.50000 | 0.50000  |          |         |         |
| # EDGE_CENTER | 1.00000  | 0.50000 | 0.50000  |          |         |         |
| # EDGE_CENTER | 0.50000  | 1.00000 | 0.50000  |          |         |         |
| # EDGE_CENTER | 1.00000  | 0.50000 | 1.00000  |          |         |         |
| # EDGE_CENTER | 0.50000  | 1.00000 | 1.00000  |          |         |         |
| # EDGE_CENTER | 0.06728  | 0.15770 | 0.27898  |          |         |         |
| # EDGE_CENTER | -0.06728 | 0.15770 | 0.22102  |          |         |         |
| # EDGE_CENTER | 0.06728  | 0.84230 | 0.77898  |          |         |         |
| # EDGE_CENTER | -0.06728 | 0.84230 | 0.72102  |          |         |         |
| # EDGE_CENTER | 0.06728  | 0.15770 | 0.27898  |          |         |         |
| # EDGE_CENTER | 0.43272  | 0.65770 | 0.22102  |          |         |         |
| # EDGE_CENTER | 0.43272  | 0.34230 | 0.72102  |          |         |         |
| # EDGE_CENTER | 0.93272  | 0.15770 | 0.22102  |          |         |         |
| # EDGE_CENTER | 0.43272  | 0.65770 | 0.22102  |          |         |         |
| # EDGE_CENTER | 0.56728  | 0.65770 | 0.27898  |          |         |         |
| # EDGE_CENTER | 0.56728  | 0.65770 | 0.27898  |          |         |         |
| # EDGE_CENTER | 0.43272  | 0.34230 | 0.72102  |          |         |         |
| # EDGE_CENTER | 0.56728  | 0.34230 | 0.77898  |          |         |         |
| # EDGE_CENTER | 0.56728  | 0.34230 | 0.77898  |          |         |         |



# EDGE\_CENTER 0.06728 0.84230 0.77898  
# EDGE\_CENTER 0.93272 0.84230 0.72102  
# EDGE\_CENTER 0.25095 0.04810 0.35874  
# EDGE\_CENTER 0.24905 0.54810 0.14126  
# EDGE\_CENTER 0.25095 0.04810 0.35874  
# EDGE\_CENTER 0.74905 0.04810 0.14126  
# EDGE\_CENTER 0.24905 0.54810 0.14126  
# EDGE\_CENTER 0.24905 0.45190 0.64126  
# EDGE\_CENTER 0.24905 0.45190 0.64126  
# EDGE\_CENTER 0.74905 0.04810 0.14126  
# EDGE\_CENTER 0.75095 0.54810 0.35874  
# EDGE\_CENTER 0.75095 0.54810 0.35874  
# EDGE\_CENTER 0.75095 0.45190 0.85874  
# EDGE\_CENTER 0.25095 0.95190 0.85874  
# EDGE\_CENTER 0.74905 0.95190 0.64126  
# EDGE\_CENTER 0.75095 0.45190 0.85874  
# EDGE\_CENTER 0.25095 0.95190 0.85874  
# EDGE\_CENTER 0.74905 0.95190 0.64126  
# EDGE\_CENTER 0.06633 0.44740 0.17024  
# EDGE\_CENTER -0.06633 0.44740 0.32976  
# EDGE\_CENTER 0.06633 0.55260 0.67024  
# EDGE\_CENTER -0.06633 0.55260 0.82976  
# EDGE\_CENTER 0.06633 0.44740 0.17024  
# EDGE\_CENTER 0.43367 -0.05260 0.32976  
# EDGE\_CENTER 0.56633 -0.05260 0.17024  
# EDGE\_CENTER 0.06633 0.55260 0.67024  
# EDGE\_CENTER 0.56633 0.05260 0.67024  
# EDGE\_CENTER 0.43367 0.05260 0.82976  
# EDGE\_CENTER 0.43367 0.94740 0.32976  
# EDGE\_CENTER 0.56633 0.94740 0.17024  
# EDGE\_CENTER 0.93367 0.44740 0.32976  
# EDGE\_CENTER 0.56633 1.05260 0.67024  
# EDGE\_CENTER 0.93367 0.55260 0.82976  
# EDGE\_CENTER 0.43367 1.05260 0.82976  
# EDGE\_CENTER 0.06633 0.43968 0.42024  
# EDGE\_CENTER -0.06633 0.43968 0.07976  
# EDGE\_CENTER 0.06633 0.56032 0.92024  
# EDGE\_CENTER -0.06633 0.56032 0.57976  
# EDGE\_CENTER 0.06633 0.56032 -0.07976  
# EDGE\_CENTER 0.43367 0.06032 0.57976  
# EDGE\_CENTER 0.56633 0.06032 -0.07976  
# EDGE\_CENTER 0.06633 0.43968 0.42024  
# EDGE\_CENTER 0.43367 0.06032 0.57976  
# EDGE\_CENTER 0.56633 0.06032 0.92024

```
# EDGE_CENTER 0.43367 0.93968 0.07976
# EDGE_CENTER 0.56633 0.93968 0.42024
# EDGE_CENTER 0.93367 0.56032 0.57976
# EDGE_CENTER 0.56633 0.93968 0.42024
# EDGE_CENTER 0.93367 0.43968 1.07976
# EDGE_CENTER 0.43367 0.93968 1.07976
# EDGE_CENTER 0.13266 0.50000 -0.15951
# EDGE_CENTER 0.13266 0.50000 0.34049
# EDGE_CENTER 0.36734 0.00000 0.15951
# EDGE_CENTER 0.36734 0.00000 0.65951
# EDGE_CENTER 0.63266 0.00000 -0.15951
# EDGE_CENTER 0.63266 0.00000 0.34049
# EDGE_CENTER 0.13266 0.50000 0.34049
# EDGE_CENTER 0.13266 0.50000 0.84049
# EDGE_CENTER 0.86734 0.50000 0.15951
# EDGE_CENTER 0.86734 0.50000 0.65951
# EDGE_CENTER 0.63266 1.00000 0.34049
# EDGE_CENTER 0.63266 1.00000 0.84049
# EDGE_CENTER 0.86734 0.50000 0.65951
# EDGE_CENTER 0.86734 0.50000 1.15951
# EDGE_CENTER 0.36734 1.00000 0.65951
# EDGE_CENTER 0.36734 1.00000 1.15951
# EDGE_CENTER 0.00000 0.08848 0.25000
# EDGE_CENTER 0.50000 0.58848 0.25000
# EDGE_CENTER 0.50000 0.41152 0.75000
# EDGE_CENTER 1.00000 0.08848 0.25000
# EDGE_CENTER 0.50000 0.58848 0.25000
# EDGE_CENTER 0.50000 0.41152 0.75000
# EDGE_CENTER 0.00000 0.91152 0.75000
# EDGE_CENTER 1.00000 0.91152 0.75000
# EDGE_CENTER 0.00000 0.30700 0.25000
# EDGE_CENTER 0.00000 0.30700 0.25000
# EDGE_CENTER 0.00000 0.69300 0.75000
# EDGE_CENTER 0.00000 0.69300 0.75000
# EDGE_CENTER 0.50000 0.19300 0.75000
# EDGE_CENTER 0.50000 0.80700 0.25000
# EDGE_CENTER 0.50000 0.19300 0.75000
# EDGE_CENTER 0.50000 0.80700 0.25000
END
```

## References

(1) Fan, W. D.; Wang, Y. T.; Xiao, Z. Y.; Zhang, L. L.; Gong, Y. Q.; Dai, F. N.; Wang, R. M.; Sun, D. F., *Inorg. Chem.* **2017**, *56*, 13634-13637.
